# Supplementary material for: Ecological drift during colonization drives within-host and between-host heterogeneity in an animal-associated symbiont
Source: PLoS Biol. 2024 Apr 25;22(4):e3002304. doi: 10.1371/journal.pbio.3002304 (PMC11075893; doi:10.1371/journal.pbio.3002304)
Supplement: S1 Code — (R) [file pbio.3002304.s018.R]

library(readxl)  #version 1.3.1
library(ggplot2) #version 3.4.2
library(scales)  #version 1.2.1; for percentage values in axes

ASVs <- read_excel("S1 Data - Caballeronia-ASVs.xlsx")
head(ASVs)

# I made modifications to the "kelly" color palette from grafify:
cbPalette <- c("#875692",
               "#F6A600",
               "#C2B280",
               "#848482",
               "#008856",
               "#0067A5",
               "#F99379",
               "#604E97",
               "#654522",
               "#B3446C",
               "#DCD300",
               "#A1CAF1",
               "#882D17",
               "Sea Green 3",
               "#E25822",
               "#F3C300",
               "#BE0032",
               "#F38400",
               "#E68FAC",
               "#2B3D26"
)

#See the "kelly" color palette and how to use it below:
#library(grafify)
#plot_grafify_palette(palette = "kelly")

# ggplot(data = InsectSprays,         #data table
#   aes(x = spray, y = count))+
#   geom_point(size = 3, aes(colour = spray))+
#   scale_colour_grafify("kelly")+
#   labs(title = "scale_colour_grafify",
#        subtitle = "(kelly palette)")+
#   theme_classic(base_size = 21)

ggplot(ASVs, aes(x=BugSpecimen, y=Abundance, fill=ASV))+
  geom_bar(position="fill", stat="identity")+
  facet_wrap(~BugLocality, nrow=1, scale="free_x")+
  theme_classic(base_size=25)+
  labs(x="Individual Insects", y="Percent Relative Abundance")+
  scale_y_continuous(expand = c(0,0), labels = percent)+
  #scale_fill_viridis(discrete=TRUE)+
  #scale_fill_discrete_qualitative("Set 2")+
  #scale_fill_grafify("kelly")+
  scale_fill_manual(values=cbPalette)+ #based on grafify's "kelly" palette
  theme(legend.position="NONE",
    axis.ticks.x = element_blank(),
    axis.text.x = element_blank()
    )

  
ggsave("C:/Users/demen/Emory University/EC Gerardo Lab - Squash Bug Projects/Jason Chen (Gerardo Lab folder)/Aim 1 Squash Bug Cocolonization/Fig1C.tiff",
       height=8, width=8.5, limitsize=FALSE)
