# Supplementary material for: Ecological drift during colonization drives within-host and between-host heterogeneity in an animal-associated symbiont
Source: PLoS Biol. 2024 Apr 25;22(4):e3002304. doi: 10.1371/journal.pbio.3002304 (PMC11075893; doi:10.1371/journal.pbio.3002304)
Supplement: S1 Data — Sequence counts of the top 20 Caballeronia 16s V3-V4 amplicon sequence variants (ASVs) from 9 bugs across 3 field localities in Georgia, Indiana, and North Carolina. Publicly available data from [7]. (XLSX) [file pbio.3002304.s011.xlsx]

## Sheet: Sheet4
ASV	BugSpecimen	BugLocality	Abundance
ASV1	DEC.1	Indiana	669
ASV1	DEC.5	Indiana	1165
ASV1	DEC.7	Indiana	1815
ASV1	OX.1	Georgia	29399
ASV1	OX.2	Georgia	25231
ASV1	OX.3	Georgia	1873
ASV1	TM.3	North Carolina	943
ASV1	TM.4	North Carolina	1884
ASV1	TM.5	North Carolina	28988
ASV2	DEC.1	Indiana	11100
ASV2	DEC.5	Indiana	18722
ASV2	DEC.7	Indiana	30037
ASV2	OX.1	Georgia	1961
ASV2	OX.2	Georgia	1795
ASV2	OX.3	Georgia	1400
ASV2	TM.3	North Carolina	1363
ASV2	TM.4	North Carolina	1636
ASV2	TM.5	North Carolina	404
ASV3	DEC.1	Indiana	17
ASV3	DEC.5	Indiana	0
ASV3	DEC.7	Indiana	35
ASV3	OX.1	Georgia	0
ASV3	OX.2	Georgia	0
ASV3	OX.3	Georgia	40
ASV3	TM.3	North Carolina	50
ASV3	TM.4	North Carolina	25
ASV3	TM.5	North Carolina	81
ASV4	DEC.1	Indiana	0
ASV4	DEC.5	Indiana	0
ASV4	DEC.7	Indiana	0
ASV4	OX.1	Georgia	880
ASV4	OX.2	Georgia	536
ASV4	OX.3	Georgia	151
ASV4	TM.3	North Carolina	75
ASV4	TM.4	North Carolina	51
ASV4	TM.5	North Carolina	767
ASV5	DEC.1	Indiana	8
ASV5	DEC.5	Indiana	0
ASV5	DEC.7	Indiana	32
ASV5	OX.1	Georgia	0
ASV5	OX.2	Georgia	0
ASV5	OX.3	Georgia	1566
ASV5	TM.3	North Carolina	8
ASV5	TM.4	North Carolina	28
ASV5	TM.5	North Carolina	242
ASV6	DEC.1	Indiana	217
ASV6	DEC.5	Indiana	0
ASV6	DEC.7	Indiana	863
ASV6	OX.1	Georgia	0
ASV6	OX.2	Georgia	0
ASV6	OX.3	Georgia	0
ASV6	TM.3	North Carolina	0
ASV6	TM.4	North Carolina	47
ASV6	TM.5	North Carolina	0
ASV7	DEC.1	Indiana	0
ASV7	DEC.5	Indiana	0
ASV7	DEC.7	Indiana	0
ASV7	OX.1	Georgia	0
ASV7	OX.2	Georgia	0
ASV7	OX.3	Georgia	0
ASV7	TM.3	North Carolina	0
ASV7	TM.4	North Carolina	0
ASV7	TM.5	North Carolina	0
ASV8	DEC.1	Indiana	130
ASV8	DEC.5	Indiana	0
ASV8	DEC.7	Indiana	0
ASV8	OX.1	Georgia	0
ASV8	OX.2	Georgia	0
ASV8	OX.3	Georgia	0
ASV8	TM.3	North Carolina	0
ASV8	TM.4	North Carolina	17
ASV8	TM.5	North Carolina	0
ASV9	DEC.1	Indiana	3
ASV9	DEC.5	Indiana	15
ASV9	DEC.7	Indiana	2
ASV9	OX.1	Georgia	35
ASV9	OX.2	Georgia	43
ASV9	OX.3	Georgia	4
ASV9	TM.3	North Carolina	1
ASV9	TM.4	North Carolina	0
ASV9	TM.5	North Carolina	28
ASV10	DEC.1	Indiana	0
ASV10	DEC.5	Indiana	0
ASV10	DEC.7	Indiana	0
ASV10	OX.1	Georgia	0
ASV10	OX.2	Georgia	0
ASV10	OX.3	Georgia	0
ASV10	TM.3	North Carolina	0
ASV10	TM.4	North Carolina	0
ASV10	TM.5	North Carolina	0
ASV11	DEC.1	Indiana	44
ASV11	DEC.5	Indiana	41
ASV11	DEC.7	Indiana	61
ASV11	OX.1	Georgia	0
ASV11	OX.2	Georgia	0
ASV11	OX.3	Georgia	0
ASV11	TM.3	North Carolina	0
ASV11	TM.4	North Carolina	0
ASV11	TM.5	North Carolina	0
ASV12	DEC.1	Indiana	0
ASV12	DEC.5	Indiana	381
ASV12	DEC.7	Indiana	0
ASV12	OX.1	Georgia	0
ASV12	OX.2	Georgia	0
ASV12	OX.3	Georgia	0
ASV12	TM.3	North Carolina	0
ASV12	TM.4	North Carolina	0
ASV12	TM.5	North Carolina	0
ASV13	DEC.1	Indiana	0
ASV13	DEC.5	Indiana	0
ASV13	DEC.7	Indiana	0
ASV13	OX.1	Georgia	0
ASV13	OX.2	Georgia	0
ASV13	OX.3	Georgia	0
ASV13	TM.3	North Carolina	0
ASV13	TM.4	North Carolina	0
ASV13	TM.5	North Carolina	0
ASV14	DEC.1	Indiana	0
ASV14	DEC.5	Indiana	0
ASV14	DEC.7	Indiana	0
ASV14	OX.1	Georgia	0
ASV14	OX.2	Georgia	0
ASV14	OX.3	Georgia	0
ASV14	TM.3	North Carolina	0
ASV14	TM.4	North Carolina	0
ASV14	TM.5	North Carolina	35
ASV15	DEC.1	Indiana	0
ASV15	DEC.5	Indiana	0
ASV15	DEC.7	Indiana	0
ASV15	OX.1	Georgia	0
ASV15	OX.2	Georgia	0
ASV15	OX.3	Georgia	0
ASV15	TM.3	North Carolina	0
ASV15	TM.4	North Carolina	0
ASV15	TM.5	North Carolina	0
ASV16	DEC.1	Indiana	0
ASV16	DEC.5	Indiana	0
ASV16	DEC.7	Indiana	0
ASV16	OX.1	Georgia	0
ASV16	OX.2	Georgia	0
ASV16	OX.3	Georgia	0
ASV16	TM.3	North Carolina	0
ASV16	TM.4	North Carolina	0
ASV16	TM.5	North Carolina	0
ASV17	DEC.1	Indiana	0
ASV17	DEC.5	Indiana	0
ASV17	DEC.7	Indiana	0
ASV17	OX.1	Georgia	0
ASV17	OX.2	Georgia	0
ASV17	OX.3	Georgia	0
ASV17	TM.3	North Carolina	0
ASV17	TM.4	North Carolina	0
ASV17	TM.5	North Carolina	4
ASV18	DEC.1	Indiana	0
ASV18	DEC.5	Indiana	0
ASV18	DEC.7	Indiana	0
ASV18	OX.1	Georgia	0
ASV18	OX.2	Georgia	2
ASV18	OX.3	Georgia	0
ASV18	TM.3	North Carolina	0
ASV18	TM.4	North Carolina	0
ASV18	TM.5	North Carolina	0
ASV19	DEC.1	Indiana	0
ASV19	DEC.5	Indiana	0
ASV19	DEC.7	Indiana	0
ASV19	OX.1	Georgia	0
ASV19	OX.2	Georgia	1
ASV19	OX.3	Georgia	0
ASV19	TM.3	North Carolina	0
ASV19	TM.4	North Carolina	0
ASV19	TM.5	North Carolina	0
