# Supplementary material for: Ecological drift during colonization drives within-host and between-host heterogeneity in an animal-associated symbiont
Source: PLoS Biol. 2024 Apr 25;22(4):e3002304. doi: 10.1371/journal.pbio.3002304 (PMC11075893; doi:10.1371/journal.pbio.3002304)
Supplement: S1 Table — Bimodality coefficients, population variances, species-level Fst, and dip statistics calculated from competition trials between GA-OX1 sfGFP and GA-OX1 RFP. (XLSX) [file pbio.3002304.s007.xlsx]

## Sheet: Sheet1
S1 Table. Bimodality coefficients, population variances, species-level Fst, and dip statistics calculated from competition trials between GA-OX1 sfGFP and GA-OX1 RFP.
Inoculum Density	Sample Size	Bimodality Coefficient	Variance	Fst (GA-OX1 RFP)	Dip Statistic
10^1—10^2	23	0.677482	0.19554	0.790989	0.152174
10^2—10^3	20	0.473498	0.136654	0.548521	0.105968
10^3—10^4	19	0.47109	0.106089	0.429979	0.0693695
10^4—10^5	8	0.289497	0.0295526	0.15082	0.130097
10^5—10^6	13	0.269943	0.0389909	0.173144	0.0757075
