# Supplementary material for: Ecological drift during colonization drives within-host and between-host heterogeneity in an animal-associated symbiont
Source: PLoS Biol. 2024 Apr 25;22(4):e3002304. doi: 10.1371/journal.pbio.3002304 (PMC11075893; doi:10.1371/journal.pbio.3002304)
Supplement: S2 Code — (R) [file pbio.3002304.s019.R]

library(ggplot2)    #version 3.4.2
library(mousetrap)  #version 3.2.0; required for bimodality_coefficient
library(readxl)     #version 1.3.1
library(scales)     #version 1.2.1; for percentage values in axes
library(dplyr)      #version 1.0.7
library(colorspace) #version 2.0.2; required for scale_fill_discrete_diverging
library(diptest)    #version 0.76.0; required for dip.test

dat <- read_excel("S2 Data - GA-OX1-only.xlsx")
#View(dat)

#I will focus on percent composition data based on amount of GA-OX1 dTomato-V1 ("RFP").

#Making the dataframe that includes all my data:
samples <- data.frame(
  categories = dat$'Dilution_Category',                  #I am aggregating my trials- this is how my trials are lumped together
  densities= dat$'Inoculum_Density_Before',              #The inoculum density each bug ingested
  bugRFPpercentages = dat$`percent_RFP_CFUs`,            #The %RFP recovered from each bug
  inocRFPpercentages = dat$'percent_dTomato_before'      #The %RFP in the inoculum ingested by each bug
)
samples<-na.omit(samples)                                #I am removing lots of NA values from bugs that remained aposymbiotic or were colonized but yielded no CFUs
samples=samples %>% arrange(categories)                  #Ordering my dataframe by aggregated trials
#samples

#We are going to add a new column to our dataframe that will specify the categories that will form the basis for our finely discrete color scale:
samples$sample_color_class <- cut(samples$bugRFPpercentages, breaks = seq.int(from=-0.01,to=1,by=0.01))
#samples

###################################################################################################################
#I also need to include, along with my data, the average %RFP across all the trials used for each aggregation category.
#NOTE: This average is unweighted!
#I am literally just averaging the %RFP for all the trials within each category regardless of how many bugs were infected within each trial.

#Making a dataframe just for data on the inocula used in my trials.
categories=c()
densities=c()
inocRFP=c()

for (i in c(1:length(samples$categories))) {
  if (i==1){
    categories<-append(categories,samples[i,1])           #read in the first bug's inoculum category
    densities<-append(densities, samples[i,2])            #read in the inoculum density this bug ingested
    inocRFP<-append(inocRFP,samples[i,4])                 #read in the inoculum %RFP this bug ingested
  }    
  
  if (i>1){
    if (samples[i,2]!=samples[i-1,2]){                    #if the next bug was in a different trial from the previous bug,
      categories<-append(categories,samples[i,1])         #read in this bug's inoculum category
      densities<-append(densities, samples[i,2])          #read in the inoculum density this bug ingested
      inocRFP<-append(inocRFP,samples[i,4])               #read in the inoculum %RFP this bug ingested
    }
  }
}

categories
densities
inocRFP

inocula.RFP <- data.frame(
  categories = categories,
  densities= densities,
  percentages = inocRFP)
inocula.RFP

#Calculating the average %RFP across all the trials for each inoculation category:
categories=c()
inoc.RFP=c()
avg.inocRFP=c()

for (i in c(1:length(inocula.RFP$categories))) {
  if (i==1){
    categories<-inocula.RFP[i,1]                            #read in the first inoculum category
    inoc.RFP<-append(inoc.RFP,inocula.RFP[i,3])             #read in the inoculum %RFP from the first trial
  }    
  
  if (i>1){
    if (inocula.RFP[i,1]==inocula.RFP[i-1,1]){              #if this next trial is in the same category as the previous trial,
      inoc.RFP<-append(inoc.RFP,inocula.RFP[i,3])           #read in the inoculum %RFP of this trial
    }
    if (inocula.RFP[i,1]!=inocula.RFP[i-1,1]){              #if this next trial is in a different category from the previous trial,
      avg.inocRFP<-append(avg.inocRFP, mean(inoc.RFP))      #calculate the mean %RFP for the previous category of trials and store it.
      categories<-append(categories,inocula.RFP[i,1])       #now that that is done, read in the next inoculum category
      inoc.RFP=c()                                          #clear the list, and
      inoc.RFP<-append(inoc.RFP,inocula.RFP[i,3])           ##read in the inoculum %RFP for this first trial
    }
    if (i==length(inocula.RFP$categories)){                 #once you have reached the final trial,
      avg.inocRFP<-append(avg.inocRFP, mean(inoc.RFP))      #calculate the mean %RFP for the previous trial and store it.
    }  
  }
}

categories
inoc.RFP
avg.inocRFP

avg.inocula.RFP <- data.frame(
  categories = categories,
  average_RFP = avg.inocRFP)
avg.inocula.RFP

#Now I can add them to my main dataset:
categories_avg.inocula.RFP=c()
for (i in c(1:length(samples$categories))) {
  for (j in c(1:length(avg.inocula.RFP$categories))) {
    if (avg.inocula.RFP[j,1]==samples[i,1]){
      categories_avg.inocula.RFP=append(categories_avg.inocula.RFP, avg.inocula.RFP[j,2])
    }
  }
}
categories_avg.inocula.RFP

#We are going to add a new column to our dataframe that will specify the categories that will form the basis for our finely discrete color scale:
samples$categories_avg.inocula.RFP <- categories_avg.inocula.RFP
head(samples)

###################################################################################################################
#Plotting the inoculum and individual bug data together (averaged inocula %RFP values)
xl <- "Inoculum Density (CFU/�L)"

#Defining the x-axis labels, which are the categorized trials
xlabels=sort(c(unique(dat$'Dilution_Category')),decreasing=TRUE)

#dot plot+violin plot for unnormalized samples, unjittered, with finely discrete color scale:
ggplot(samples, aes(x = categories, y = bugRFPpercentages, fill = sample_color_class))+
  geom_violin(width=1, color="gray", fill="gray", alpha= 0.3, size=1)+
  #geom_hline(yintercept=mean(unique(samples$inocRFPpercentages)), size=2, linetype=2)+
  geom_point(aes(y= categories_avg.inocula.RFP), size=3, color="#00AAD4", pch=4, stroke=3.5)+
  geom_dotplot(binwidth= 1/100, dotsize = 3, binaxis = "y", stackdir = "center", alpha=0.6)+
  scale_fill_discrete_diverging(h1=300, c1=135, l1=61, h2=117, cmax=118, l2=95, p1=2.5, p2=2.75, rev=TRUE)+
  scale_y_continuous(limits = c(-0.05,1.07), breaks=c(0,0.25,0.5,0.75,1),labels=percent)+
  scale_x_discrete(limits = xlabels, labels = c(expression("10"^5-"10"^6), expression("10"^4-"10"^5), expression("10"^3-"10"^4), expression("10"^2-"10"^3), expression("10"^1-"10"^2), expression("10"^0-"10"^1)))+
  theme_classic(base_size=25)+
  labs(x=xl, y="% RFP Composition")+
  theme(axis.ticks.x = element_blank(), axis.text.x = element_text(vjust=0.85), legend.position = "none")+
  
  #The only significantly non-unimodal outcome for this set of experiments is at 10^1-2. We will put an asterisk there to indicate this significant outcome.
  geom_text(data=tibble(x=5, y=1.07), aes(x=x,y=y,label="*"), size=15, inherit.aes = FALSE)+
  
  #Now we need to put in data on colonization rate: Note that this based solely on successful recovery of at least one GFP or RFP CFU, NOT visual assessment of M4s. This excludes a small minority of M4s that were clearly colonized but did not yield any viable CFUs.
  geom_text(data=tibble(x=1, y=-0.05), aes(x=x,y=y,label="13/16"), size=6.5, inherit.aes = FALSE)+
  geom_text(data=tibble(x=2, y=-0.05), aes(x=x,y=y,label="8/9"), size=6.5, inherit.aes = FALSE)+
  geom_text(data=tibble(x=3, y=-0.05), aes(x=x,y=y,label="19/24"), size=6.5, inherit.aes = FALSE)+
  geom_text(data=tibble(x=4, y=-0.05), aes(x=x,y=y,label="20/36"), size=6.5, inherit.aes = FALSE)+
  geom_text(data=tibble(x=5, y=-0.05), aes(x=x,y=y,label="23/50"), size=6.5, inherit.aes = FALSE)

#ggsave("~/Fig2B.tiff", height=8, width=11, limitsize=FALSE)

###################################################################################################################
#Plotting bimodality coefficients from percentage data aggregated by inoculum size:

#initialize lists for all measures of variation based on all bugs:
RFP_bugs=c()
RFP_trials=c()
RFP_coefficients=c()
RFP_variances=c()
RFP_variances3=c()
RFP_fsts=c()
RFP_dips=c()

#initialize lists for jackknifed calculations of bimodality coefficient:
RFP_trials.jk=c()
Bc.jk=c()
Bc.all=c()
RFP_coefficients_JK=data.frame()

for (i in c(1:nrow(samples))) {
  if (i==1){
    RFP_trials<-samples[i,1]                      #read in the first trial's inoculum size
    RFP_bugs<-append(RFP_bugs,samples[i,3])       #begin collecting bug results from this trial so we can analyze it
  }    
  
  if (i>1){
    if (samples[i,1]==samples[i-1,1]){            #if the inoculum treatment for this next bug is the same as the previous bug,
      RFP_bugs<-append(RFP_bugs,samples[i,3])     #add its result into RFP_bugs
    }
    if (samples[i,1]!=samples[i-1,1]){            #We have collected all the bugs from a single treatment group. Now we can make calculations.
      #Quality control checks:
      #print(paste("For the trials using an inoculum containing 10^", samples[i-1,1], "CFU/uL, the % GA-OX1 composition inside the bugs was:"))
      #print(RFP_bugs)
      #print(paste("For the trials using an inoculum containing 10^", samples[i-1,1], "CFU/uL, the bimodality coefficient was:"))
      #print(bimodality_coefficient(RFP_bugs))
      
      #Calculations from all the bugs in the treatment:
      #Calculating bimodality coefficient:
      RFP_coefficients<-append(RFP_coefficients, bimodality_coefficient(RFP_bugs))
      
      #Calculating population variance:
      #remember that var() calculates a sample variance, so we need to correct for this.
      RFP_variances<-append(RFP_variances, var(RFP_bugs)*(length(RFP_bugs)-1)/(length(RFP_bugs)))
      RFP_variances3<-append(RFP_variances3, 3*var(RFP_bugs))      #calculate the variance for the previous trial
      
      #Calculating GA-OX1 RFP Fst:
      fst=var(RFP_bugs)*(length(RFP_bugs)-1)/(length(RFP_bugs))/mean(RFP_bugs)/(1-mean(RFP_bugs))
      RFP_fsts=append(RFP_fsts, fst)
      
      #Calculating the dip statistic:
      RFP_dips<-append(RFP_dips, dip(RFP_bugs))
      
      for (n in c(1:length(RFP_bugs))) {
        sequence=RFP_bugs[-n]
        Bc.jk<-append(Bc.jk, bimodality_coefficient(sequence))
        RFP_trials.jk<-append(RFP_trials.jk, samples[i-1,1])
        Bc.all<-append(Bc.all, bimodality_coefficient(RFP_bugs))
      }
      
      df<-data.frame(RFP_trials.jk,Bc.jk, Bc.all)
      RFP_coefficients_JK<-rbind(RFP_coefficients_JK,df)
      
      
      
      #Now that that we have done all the analyses for that treatment, read in the next treatment groups's inoculum size...
      RFP_trials<-append(RFP_trials,samples[i,1])
      #print(samples[i,1])
      RFP_bugs=c()
      RFP_bugs<-append(RFP_bugs,samples[i,3]) #...and reset/re-initialize the list of bugs for the next treatment group.
      Bc.all=c()
      RFP_trials.jk=c()
      Bc.jk=c()
      
    }
    if (i==nrow(samples)){                               #We have collected all the bugs from the last treatment group. Now we can make calculations.
      
      #Quality control checks:
      # print(paste("For the trials using an inoculum containing 10^", samples[i-1,1], "CFU/uL, the % GA-OX1 composition inside the bugs was:"))
      # print(RFP_bugs)
      # print(paste("For the trial using an inoculum containing", samples[i-1,1], "CFU/uL, the bimodality coefficient was:"))
      # print(bimodality_coefficient(RFP_bugs))
      
      for (n in c(1:length(RFP_bugs))) {
        sequence=RFP_bugs[-n]
        Bc.jk<-append(Bc.jk, bimodality_coefficient(sequence))
        RFP_trials.jk<-append(RFP_trials.jk, samples[i-1,1])
        Bc.all<-append(Bc.all, bimodality_coefficient(RFP_bugs))
      }
      
      df<-data.frame(RFP_trials.jk,Bc.jk, Bc.all)
      RFP_coefficients_JK<-rbind(RFP_coefficients_JK,df)
      
      #Calculations from all the bugs in the treatment:
      #Calculating bimodality coefficient:
      RFP_coefficients<-append(RFP_coefficients, bimodality_coefficient(RFP_bugs))
      
      #Calculating population variance:
      #remember that var() calculates a sample variance, so we need to correct for this.
      RFP_variances<-append(RFP_variances, var(RFP_bugs)*(length(RFP_bugs)-1)/(length(RFP_bugs)))
      RFP_variances3<-append(RFP_variances3, 3*var(RFP_bugs))      #calculate the variance for the previous trial
      
      #Calculating GA-OX1 RFP Fst:
      fst=var(RFP_bugs)*(length(RFP_bugs)-1)/(length(RFP_bugs))/mean(RFP_bugs)/(1-mean(RFP_bugs))
      RFP_fsts=append(RFP_fsts, fst)
      
      #Calculating the dip statistic:
      RFP_dips<-append(RFP_dips, dip(RFP_bugs))
      
      #print(samples[i,1])
      RFP_bugs=c()
      RFP_bugs<-append(RFP_bugs,samples[i,3]) #...and reset/re-initialize the list of bugs for the next treatment group.
      
      
    }
  }  
}

#Visualizing jackknifed bimodality coefficients:

# RFP_trials.jk
# Bc.jk
# Bc.all
# RFP_coefficients_JK

ggplot(RFP_coefficients_JK, aes(x=RFP_trials.jk, y=Bc.jk))+
  geom_boxplot(fill="gray90", lwd=0.5)+
  geom_point(aes(y=Bc.all), size=4, color="#00AAD4", alpha=0.2)+
  #geom_jitter(width=0.3, color="gray40", size=2.5, alpha=0.6)+
  geom_hline(size=1.5, linetype="dotted", yintercept=0.555)+
  scale_y_continuous(limits = c(0,1))+
  scale_x_discrete(limits = xlabels, labels = c(expression("10"^5-"10"^6), expression("10"^4-"10"^5), expression("10"^3-"10"^4), expression("10"^2-"10"^3), expression("10"^1-"10"^2), expression("10"^0-"10"^1)))+
  theme_classic(base_size=25)+
  theme(axis.text.x = element_text(angle=17, hjust=0.5))+
  labs(x=xl, y="Bimodality Coefficient")+
  theme(axis.ticks.x = element_blank(), axis.text.x = element_text(vjust=0.85), legend.position = "none")+
  
  #The only significantly non-unimodal outcome for this set of experiments is at 10^1-2. We will put an asterisk there to indicate this significant outcome.
  geom_text(data=tibble(x=5, y=1.0), aes(x=x,y=y,label="*"), size=15, inherit.aes = FALSE)

#ggsave("~/Fig2C_JK.tiff", height=8, width=8, limitsize=FALSE)


#Visualizing calculations of spread from all the bugs:

#RFP_bugs
#RFP_trials
#RFP_coefficients
#RFP_variances
#RFP_variances3
#RFP_fsts
#RFP_dips

df.all <- data.frame(
  Inoculum_Density = RFP_trials,
  Bimodality_Coefficient = RFP_coefficients,
  Variance = RFP_variances,
  three_times_variance = RFP_variances3,
  RFP_Fst=RFP_fsts,
  Dip_Statistic=RFP_dips)
df.all
#write.csv(df.all, "~/S1_Table.csv", row.names=FALSE)

#plot bimodality coefficient + Fst + variance, using three_times_variance and a compensatory y-axis:
ggplot(df.all, aes(x = Inoculum_Density))+
  geom_point(aes(y=Bimodality_Coefficient), size=7, pch=16, stroke=1.5)+
  #geom_point(aes(y=three_times_variance), size=7, color='#00ADAD')+
  geom_point(aes(y=RFP_fsts), size=7, color='#00ADAD')+
  geom_hline(size=1.5, linetype="dotted", yintercept=0.555)+
  scale_y_continuous(limits = c(0,1), name="Bimodality Coefficient", breaks=c(0,0.555,1), sec.axis = sec_axis(trans=~./1, name="Fst"))+   #sec.axis specifies a second y-axis.
  #scale_y_continuous(limits = c(0,1), name="Bimodality Coefficient", breaks=c(0,0.555,1)#, sec.axis = sec_axis(trans = ~./3, name="Variance")
  #                     )+   #sec.axis specifies a second y-axis. trans rescales the y-axis by one-third, compensating for the fact we multiplied the raw variance values by 3.
  scale_x_discrete(limits = xlabels, labels = c(expression("10"^5-"10"^6), expression("10"^4-"10"^5), expression("10"^3-"10"^4), expression("10"^2-"10"^3), expression("10"^1-"10"^2), expression("10"^0-"10"^1)))+
  labs(x=xl)+
  theme_classic(base_size=25)+
  theme(axis.text.x = element_text(angle=15, vjust=0.85), legend.position = "none", axis.line.y.right=element_line(color='#00ADAD'), axis.ticks.y.right=element_line(color='#00ADAD'))+
  
  #The only significantly non-unimodal outcome for this set of experiments is at 1-2. We will put an asterisk there to indicate this significant outcome.
  geom_text(data=tibble(x=5, y=1), aes(x=x,y=y,label="*"), size=12, inherit.aes = FALSE)

#ggsave("~/Fig2C.tiff", height=8, width=8, limitsize=FALSE)


################################################################################################################
#Hartigan's Dip Test- use this for significance testing of multimodality.
#The calculation of the dip statistic is also integrated into the above workflow; this piece of code is dedicated for Hartigan's dip specifically.

dat <- read_excel("C:/Users/demen/Emory University/EC Gerardo Lab - Squash Bug Projects/Jason Chen (Gerardo Lab folder)/Aim 1 Squash Bug Cocolonization/GA-OX1, GA-OX1 neutral competition/GA-OX1_neutral_competition.xlsx", sheet = "all_data_cleaned")

df.dip <- data.frame(                              #make a dataframe to hold:
  densities = dat$'Dilution_Category',          #the inoculum density
  percentages = dat$`percent_RFP_CFUs`                     #the proportion of RFP in each individual bug
)
df.dip<-na.omit(df.dip)
#df.dip
samples=df.dip %>% arrange(densities)               #rearrange the dataframe by aggregated inoculum treatment
#tail(samples)

FP_bugs=c()
FP_trials=c()
FP_dips=c()

for (i in c(1:length(samples$densities))) {
  if (i==1){
    print(samples[i,1])
    FP_trials<-samples[i,1]                        #read in the first trial's inoculum size
    FP_bugs<-append(FP_bugs,samples[i,2])         #begin collecting bug results from this trial so we can analyze it
  }    
  
  if (i>1){
    if (samples[i,1]==samples[i-1,1]){              #if the inoculum treatment for this next bug is the same as the previous bug,
      FP_bugs<-append(FP_bugs,samples[i,2])       #add its result into RFP_bugs
    }
    if (samples[i,1]!=samples[i-1,1]){
      print(FP_bugs)
      #print(paste("For the trial using an inoculum containing", df1[i-1,1], "CFU/uL, the dip statistic is:"))
      #print(dip(FP_bugs))                                                         #before we read in the next trial's data,
      FP_dips<-append(FP_dips, dip(FP_bugs))                                     #calculate the dip statistic for the previous trial
      print(dip.test(FP_bugs, simulate.p.value = TRUE, B=length(FP_bugs)))        #calculate a p-value by Monte Carlo simulation
      #print(is.bimodal(FP_bugs))
      FP_trials<-append(FP_trials,samples[i,1])                                   #now that that is done, read in the next trial's inoculum size
      print(samples[i,1])                                            
      FP_bugs=c()
      FP_bugs<-append(FP_bugs,samples[i,2])
    }
    if (i==length(samples$densities)){
      #print(FP_bugs)
      #print(paste("For the trial using an inoculum containing", df1[i-1,1], "CFU/uL, the dip statistic was:"))
      #print(dip(FP_bugs))
      FP_dips<-append(FP_dips, dip(FP_bugs))
      print(dip.test(FP_bugs, simulate.p.value = TRUE, B=length(FP_bugs)))
      #print(is.bimodal(FP_bugs))
      
    }  
  }
  
}

FP_bugs
FP_trials
FP_dips

df.a <- data.frame(
  treatment = FP_trials,
  coeff = FP_dips)
#df.a

colnames(df.a)<-c("Inoculum_Density","Dip_Statistic")
df.b<-df.a[order(nrow(df.a):1),]

plot.dips <-ggplot(df.b, aes(x = Inoculum_Density))+
  geom_point(aes(y=Dip_Statistic), size=7)+
  #scale_y_continuous(limits = c(0,1))+
  scale_x_discrete(limits = rev(unique(df.a$Inoculum_Density)))+
  labs(x="Inoculum Density (log(CFU/�L))", y="Dip Statistic")+
  theme_classic(base_size=30)+
  theme(axis.text.x = element_text(angle=30, hjust=0.5, vjust=0.65), axis.title.x = element_text(vjust=-0.5), legend.position = "none")

print(plot.dips)
print(df.b)

#write.csv(df.b, file=paste("neutral-diptest_results.csv"), row.names=FALSE)
