# Supplementary material for: Ecological drift during colonization drives within-host and between-host heterogeneity in an animal-associated symbiont
Source: PLoS Biol. 2024 Apr 25;22(4):e3002304. doi: 10.1371/journal.pbio.3002304 (PMC11075893; doi:10.1371/journal.pbio.3002304)
Supplement: S2 Data — Colony count data of GA-OX1 sfGFP and GA-OX1 RFP colonization trials from each insect, including insects from which no fluorescent colonies were recovered. (XLSX) [file pbio.3002304.s012.xlsx]

## Sheet: all_data_cleaned
Index	Trial	L2 ID	Dilution	Dilution_Category	sfGFP_Inoculum_before	dTomato_Inoculum_before	Inoculum_Density_Before	percent_sfGFP_before	percent_dTomato_before	sfGFP_Inoculum_after	dTomato_Inoculum_after	Inoculum_Density_after	percent_sfGFP_after	percent_dTomato_after	Did_it_feed?	Crypt_phenotype	Dilution_Level	GFP_CFU_1	GFP_CFU_2	GFP_CFU_3	Spot_Volume_(uL)	Average_GFP_CFU/uL	Total_GFP_CFU/sample	Dilution_Level	dTomato_CFU_1	dTomato_CFU_2	dTomato_CFU_3	Spot_Volume_(uL)	Average_dTomato_CFU/uL	Total_dTomato_CFU/sample	Average_CFU/uL	Total_CFU/sample	percent_GFP_CFUs	percent_RFP_CFUs
1	3	A1	4	2—3	181.667	164.167	345.833	0.525301	0.474699	233.333	358.333	591.667	0.394366	0.605634		aposymbiotic	0	0	0	0	40	0	0	0	0	0	0	40	0	0	0	0	#DIV/0!	#DIV/0!
2	3	A2	4	2—3	181.667	164.167	345.833	0.525301	0.474699	233.333	358.333	591.667	0.394366	0.605634		aposymbiotic	0	0	0	0	40	0	0	0	0	0	0	40	0	0	0	0	#DIV/0!	#DIV/0!
3	3	A3	4	2—3	181.667	164.167	345.833	0.525301	0.474699	233.333	358.333	591.667	0.394366	0.605634		aposymbiotic	0	0	0	0	40	0	0	0	0	0	0	40	0	13	0	13	0	1
4	3	B1	4	2—3	181.667	164.167	345.833	0.525301	0.474699	233.333	358.333	591.667	0.394366	0.605634		aposymbiotic	0	0	0	0	40	0	0	0	0	0	0	40	0	0	0	0	#DIV/0!	#DIV/0!
5	3	B2	4	2—3	181.667	164.167	345.833	0.525301	0.474699	233.333	358.333	591.667	0.394366	0.605634		GFP only	1	200	200	200	40	50	15000	1	16	3	5	40	2	600	52	15600	0.961538	0.0384615
6	3	B3	4	2—3	181.667	164.167	345.833	0.525301	0.474699	233.333	358.333	591.667	0.394366	0.605634		RFP only	0	0	0	0	40	0	0	0	200	200	200	40	5	1500	5	1500	0	1
7	3	C1	4	2—3	181.667	164.167	345.833	0.525301	0.474699	233.333	358.333	591.667	0.394366	0.605634		aposymbiotic	0	0	0	0	40	0	0	0	0	0	0	40	0	0	0	0	#DIV/0!	#DIV/0!
8	3	C2	4	2—3	181.667	164.167	345.833	0.525301	0.474699	233.333	358.333	591.667	0.394366	0.605634		almost all GFP, some RFP in M4b	0	200	200	200	40	5	1500	0	0	0	0	40	0	0	5	1500	1	0
9	3	C3	4	2—3	181.667	164.167	345.833	0.525301	0.474699	233.333	358.333	591.667	0.394366	0.605634		almost all GFP, some RFP	1	212	217	230	40	54.9167	16475	1	21	26	32	40	6.58333	1975	61.5	18450	0.892954	0.107046
10	3	D1	4	2—3	181.667	164.167	345.833	0.525301	0.474699	233.333	358.333	591.667	0.394366	0.605634		aposymbiotic	0	0	0	0	40	0	0	0	0	0	0	40	0	0	0	0	#DIV/0!	#DIV/0!
11	3	D2	4	2—3	181.667	164.167	345.833	0.525301	0.474699	233.333	358.333	591.667	0.394366	0.605634		aposymbiotic	0	0	0	0	40	0	0	0	0	0	0	40	0	0	0	0	#DIV/0!	#DIV/0!
12	3	D3	4	2—3	181.667	164.167	345.833	0.525301	0.474699	233.333	358.333	591.667	0.394366	0.605634		very little GFP only	0	0	0	1	40	0.00833333	2.5	0	7	1	10	40	0.15	45	0.158333	47.5	0.0526316	0.947368
13	3	A1	3	3—4	1983.33	2241.67	4225	0.469428	0.530572	5083.33	4666.67	9750	0.521368	0.478632		RFP only	0	0	0	0	40	0	0	0	200	200	200	40	5	1500	5	1500	0	1
14	3	A2	3	3—4	1983.33	2241.67	4225	0.469428	0.530572	5083.33	4666.67	9750	0.521368	0.478632		aposymbiotic	0	0	0	0	40	0	0	0	0	0	0	40	0	0	0	0	#DIV/0!	#DIV/0!
15	3	A3	3	3—4	1983.33	2241.67	4225	0.469428	0.530572	5083.33	4666.67	9750	0.521368	0.478632		aposymbiotic	0	0	0	0	40	0	0	0	0	0	0	40	0	0	0	0	#DIV/0!	#DIV/0!
16	3	B1	3	3—4	1983.33	2241.67	4225	0.469428	0.530572	5083.33	4666.67	9750	0.521368	0.478632		aposymbiotic	0	0	0	0	40	0	0	0	0	0	0	40	0	0	0	0	#DIV/0!	#DIV/0!
17	3	B2	3	3—4	1983.33	2241.67	4225	0.469428	0.530572	5083.33	4666.67	9750	0.521368	0.478632		aposymbiotic	0	0	0	0	40	0	0	0	0	0	0	40	0	0	0	0	#DIV/0!	#DIV/0!
18	3	B3	3	3—4	1983.33	2241.67	4225	0.469428	0.530572	5083.33	4666.67	9750	0.521368	0.478632		aposymbiotic	0	0	0	0	40	0	0	0	0	0	0	40	0	0	0	0	#DIV/0!	#DIV/0!
19	3	C1	3	3—4	1983.33	2241.67	4225	0.469428	0.530572	5083.33	4666.67	9750	0.521368	0.478632		RFP only	0	0	0	0	40	0	0	0	200	200	200	40	5	1500	5	1500	0	1
20	3	C2	3	3—4	1983.33	2241.67	4225	0.469428	0.530572	5083.33	4666.67	9750	0.521368	0.478632		both RFP and GFP; more GFP	1	500	500	500	40	125	37500	1	90	97	84	40	22.5833	6775	147.583	44275	0.846979	0.153021
21	3	C3	3	3—4	1983.33	2241.67	4225	0.469428	0.530572	5083.33	4666.67	9750	0.521368	0.478632		early colonization; both RFP and GFP but more RFP	0	40	40	40	40	1	300	0	160	160	160	40	4	1200	5	1500	0.2	0.8
22	3	D1	3	3—4	1983.33	2241.67	4225	0.469428	0.530572	5083.33	4666.67	9750	0.521368	0.478632		GFP only	1	500	500	500	40	125	37500	1	0	0	0	40	0	0	125	37500	1	0
23	3	D2	3	3—4	1983.33	2241.67	4225	0.469428	0.530572	5083.33	4666.67	9750	0.521368	0.478632		early colonization; GFP only	1	79	74	127	40	23.3333	7000	1	1	0	0	40	0.0833333	25	23.4167	7025	0.996441	0.00355872
24	3	D3	3	3—4	1983.33	2241.67	4225	0.469428	0.530572	5083.33	4666.67	9750	0.521368	0.478632		GFP only	0	500	500	500	40	12.5	3750	0	8	12	14	40	0.283333	85	12.7833	3835	0.977836	0.0221643
25	4	A4	33% Dil 2	3—4	2200	891.667	3091.67	0.71159	0.28841	7416.67	2916.67	10333.3	0.717742	0.282258	yes	co-colonization					40	#DIV/0!	#DIV/0!					40	#DIV/0!	#DIV/0!	#DIV/0!	#DIV/0!	#DIV/0!	#DIV/0!
27	4	A6	33% Dil 2	3—4	2200	891.667	3091.67	0.71159	0.28841	7416.67	2916.67	10333.3	0.717742	0.282258	yes	co-colonization					40	#DIV/0!	#DIV/0!					40	#DIV/0!	#DIV/0!	#DIV/0!	#DIV/0!	#DIV/0!	#DIV/0!
28	4	B4	33% Dil 2	3—4	2200	891.667	3091.67	0.71159	0.28841	7416.67	2916.67	10333.3	0.717742	0.282258	yes	co-colonization					40	#DIV/0!	#DIV/0!					40	#DIV/0!	#DIV/0!	#DIV/0!	#DIV/0!	#DIV/0!	#DIV/0!
29	4	B5	33% Dil 2	3—4	2200	891.667	3091.67	0.71159	0.28841	7416.67	2916.67	10333.3	0.717742	0.282258	yes	co-colonization	1	100	77	106	40	23.5833	7075	1	140	126	120	40	32.1667	9650	55.75	16725	0.423019	0.576981
30	4	B6	33% Dil 2	3—4	2200	891.667	3091.67	0.71159	0.28841	7416.67	2916.67	10333.3	0.717742	0.282258	yes	co-colonization					40	#DIV/0!	#DIV/0!					40	#DIV/0!	#DIV/0!	#DIV/0!	#DIV/0!	#DIV/0!	#DIV/0!
31	4	C4	33% Dil 2	3—4	2200	891.667	3091.67	0.71159	0.28841	7416.67	2916.67	10333.3	0.717742	0.282258	yes	co-colonization					40	#DIV/0!	#DIV/0!					40	#DIV/0!	#DIV/0!	#DIV/0!	#DIV/0!	#DIV/0!	#DIV/0!
32	4	C5	33% Dil 2	3—4	2200	891.667	3091.67	0.71159	0.28841	7416.67	2916.67	10333.3	0.717742	0.282258	yes	co-colonization					40	#DIV/0!	#DIV/0!					40	#DIV/0!	#DIV/0!	#DIV/0!	#DIV/0!	#DIV/0!	#DIV/0!
33	4	C6	33% Dil 2	3—4	2200	891.667	3091.67	0.71159	0.28841	7416.67	2916.67	10333.3	0.717742	0.282258	yes	co-colonization					40	#DIV/0!	#DIV/0!					40	#DIV/0!	#DIV/0!	#DIV/0!	#DIV/0!	#DIV/0!	#DIV/0!
34	4	D4	33% Dil 2	3—4	2200	891.667	3091.67	0.71159	0.28841	7416.67	2916.67	10333.3	0.717742	0.282258	no	co-colonization					40	#DIV/0!	#DIV/0!					40	#DIV/0!	#DIV/0!	#DIV/0!	#DIV/0!	#DIV/0!	#DIV/0!
35	4	D5	33% Dil 2	3—4	2200	891.667	3091.67	0.71159	0.28841	7416.67	2916.67	10333.3	0.717742	0.282258	yes	co-colonization	3	51	41	49	40	1175	352500	3	26	18	20	40	533.333	160000	1708.33	512500	0.687805	0.312195
37	4	A1	66% Dil 2	3—4	3533.33	1966.67	5500	0.642424	0.357576	14500	7250	21750	0.666667	0.333333	yes	co-colonization	1	5	3	3	40	0.916667	275	1	3	4	5	40	1	300	1.91667	575	0.478261	0.521739
39	4	B1	66% Dil 2	3—4	3533.33	1966.67	5500	0.642424	0.357576	14500	7250	21750	0.666667	0.333333	yes	co-colonization	4	19	26	30	40	6250	1875000	4	15	14	13	40	3500	1050000	9750	2925000	0.641026	0.358974
40	4	B2	66% Dil 2	3—4	3533.33	1966.67	5500	0.642424	0.357576	14500	7250	21750	0.666667	0.333333	no	co-colonization	2	46	58	53	40	130.833	39250	2	34	36	26	40	80	24000	210.833	63250	0.620553	0.379447
41	4	C1	66% Dil 2	3—4	3533.33	1966.67	5500	0.642424	0.357576	14500	7250	21750	0.666667	0.333333	no	co-colonization	3	98	108	134	40	2833.33	850000	3	27	34	23	40	700	210000	3533.33	1060000	0.801887	0.198113
42	4	C2	66% Dil 2	3—4	3533.33	1966.67	5500	0.642424	0.357576	14500	7250	21750	0.666667	0.333333	yes	co-colonization	2	125	114	109	40	290	87000	2	41	41	40	40	101.667	30500	391.667	117500	0.740426	0.259574
43	4	D1	66% Dil 2	3—4	3533.33	1966.67	5500	0.642424	0.357576	14500	7250	21750	0.666667	0.333333	yes	co-colonization	2	6	9	11	40	21.6667	6500	2	9	6	3	40	15	4500	36.6667	11000	0.590909	0.409091
44	4	A1	2	3—4	4800	2600	7400	0.648649	0.351351	14500	7916.67	22416.7	0.64684	0.35316	yes	co-colonization	3	192	140	141	40	3941.67	1182500	3	55	66	60	40	1508.33	452500	5450	1635000	0.723242	0.276758
45	4	A2	2	3—4	4800	2600	7400	0.648649	0.351351	14500	7916.67	22416.7	0.64684	0.35316	yes	co-colonization					40	#DIV/0!	#DIV/0!					40	#DIV/0!	#DIV/0!	#DIV/0!	#DIV/0!	#DIV/0!	#DIV/0!
46	4	B1	2	3—4	4800	2600	7400	0.648649	0.351351	14500	7916.67	22416.7	0.64684	0.35316	yes	co-colonization	1	109	123	110	40	28.5	8550	1	56	65	50	40	14.25	4275	42.75	12825	0.666667	0.333333
47	4	B2	2	3—4	4800	2600	7400	0.648649	0.351351	14500	7916.67	22416.7	0.64684	0.35316	yes	co-colonization	0	20	12	8	40	0.333333	100	0	71	83	82	40	1.96667	590	2.3	690	0.144928	0.855072
48	4	C2	2	3—4	4800	2600	7400	0.648649	0.351351	14500	7916.67	22416.7	0.64684	0.35316	yes	co-colonization	1	0	2	0	40	0.166667	50	1	14	12	15	40	3.41667	1025	3.58333	1075	0.0465116	0.953488
49	10	B4	2	4—5	23833.3	35750	59583.3	0.4	0.6	37750	38833.3	76583.3	0.492927	0.507073	group feeding	colonized	2	121	139	121	40	317.5	95250	0	0	0	0	40	0	0	317.5	95250	1	0
50	10	B1	1	5—6	206667	337500	544167	0.379786	0.620214	360833	390833	751667	0.480044	0.519956	group feeding	colonized	4	67	55	61	40	15250	4575000	4	71	62	56	40	15750	4725000	31000	9300000	0.491935	0.508065
51	10	B3	1	5—6	206667	337500	544167	0.379786	0.620214	360833	390833	751667	0.480044	0.519956	group feeding	colonized	3	27	41	27	40	791.667	237500	4	11	13	7	40	2583.33	775000	3375	1012500	0.234568	0.765432
52	10	C4	1	5—6	206667	337500	544167	0.379786	0.620214	360833	390833	751667	0.480044	0.519956	group feeding	aposymbiotic	3	132	119	156	40	3391.67	1017500	3	78	63	108	40	2075	622500	5466.67	1640000	0.620427	0.379573
53	10	D2	1	5—6	206667	337500	544167	0.379786	0.620214	360833	390833	751667	0.480044	0.519956	group feeding	colonized with lots of RFP	4	55	46	42	40	11916.7	3575000	4	36	39	40	40	9583.33	2875000	21500	6450000	0.554264	0.445736
54	10	D3	1	5—6	206667	337500	544167	0.379786	0.620214	360833	390833	751667	0.480044	0.519956	group feeding	colonized third instar	4	84	76	73	40	19416.7	5825000	4	17	17	26	40	5000	1500000	24416.7	7325000	0.795222	0.204778
55	10	D4	1	5—6	206667	337500	544167	0.379786	0.620214	360833	390833	751667	0.480044	0.519956	group feeding	colonized	4	21	21	26	40	5666.67	1700000	4	6	3	1	40	833.333	250000	6500	1950000	0.871795	0.128205
56	11	A3	3	4—5	4125	6916.67	11041.7	0.373585	0.626415	4150	6500	10650	0.389671	0.610329		Colonized	1	91	95	99	40	23.75	7125	1	99	84	87	40	22.5	6750	46.25	13875	0.513514	0.486486
57	11	A5	3	4—5	4125	6916.67	11041.7	0.373585	0.626415	4150	6500	10650	0.389671	0.610329		RFP colonization but on dirty squash	n/a	contamination	contamination	contamination	40	#DIV/0!	#DIV/0!	n/a	contamination	contamination	contamination	40	#DIV/0!	#DIV/0!	#DIV/0!	#DIV/0!	#DIV/0!	#DIV/0!
58	11	B1	3	4—5	4125	6916.67	11041.7	0.373585	0.626415	4150	6500	10650	0.389671	0.610329		Colonized	n/a	contamination	contamination	contamination	40	#DIV/0!	#DIV/0!	n/a	contamination	contamination	contamination	40	#DIV/0!	#DIV/0!	#DIV/0!	#DIV/0!	#DIV/0!	#DIV/0!
59	11	B2	3	4—5	4125	6916.67	11041.7	0.373585	0.626415	4150	6500	10650	0.389671	0.610329		RFP colonized	1	19	25	35	40	6.58333	1975	1	6	7	6	40	1.58333	475	8.16667	2450	0.806122	0.193878
60	11	B3	3	4—5	4125	6916.67	11041.7	0.373585	0.626415	4150	6500	10650	0.389671	0.610329		Colonized	4	35	51	33	40	9916.67	2975000	4	19	9	13	40	3416.67	1025000	13333.3	4000000	0.74375	0.25625
61	11	B4	3	4—5	4125	6916.67	11041.7	0.373585	0.626415	4150	6500	10650	0.389671	0.610329		Aposymbiotic	0	0	0	0	40	0	0	0	0	0	0	40	0	0	0	0	#DIV/0!	#DIV/0!
62	11	C1	3	4—5	4125	6916.67	11041.7	0.373585	0.626415	4150	6500	10650	0.389671	0.610329		Aposymbiotic	0	contamination	contamination	contamination	40	#DIV/0!	#DIV/0!	0	contamination	contamination	contamination	40	#DIV/0!	#DIV/0!	#DIV/0!	#DIV/0!	#DIV/0!	#DIV/0!
63	11	C2	3	4—5	4125	6916.67	11041.7	0.373585	0.626415	4150	6500	10650	0.389671	0.610329		Aposymbiotic	0	contamination	contamination	contamination	40	#DIV/0!	#DIV/0!	0	contamination	contamination	contamination	40	#DIV/0!	#DIV/0!	#DIV/0!	#DIV/0!	#DIV/0!	#DIV/0!
64	11	D1	3	4—5	4125	6916.67	11041.7	0.373585	0.626415	4150	6500	10650	0.389671	0.610329		Colonized	4	48	45	42	40	11250	3375000	3	22	24	32	40	650	195000	11900	3570000	0.945378	0.0546218
65	11	D2	3	4—5	4125	6916.67	11041.7	0.373585	0.626415	4150	6500	10650	0.389671	0.610329		Colonized	2	16	33	24	40	60.8333	18250	2	21	18	13	40	43.3333	13000	104.167	31250	0.584	0.416
66	11	D3	3	4—5	4125	6916.67	11041.7	0.373585	0.626415	4150	6500	10650	0.389671	0.610329		Colonized	3	21	26	21	40	566.667	170000	3	16	23	23	40	516.667	155000	1083.33	325000	0.523077	0.476923
67	11	D4	3	4—5	4125	6916.67	11041.7	0.373585	0.626415	4150	6500	10650	0.389671	0.610329		Colonized	3	87	88	78	40	2108.33	632500	3	29	29	29	40	725	217500	2833.33	850000	0.744118	0.255882
68	11	D5	3	4—5	4125	6916.67	11041.7	0.373585	0.626415	4150	6500	10650	0.389671	0.610329		Aposymbiotic	n/a	contamination	contamination	contamination	40	#DIV/0!	#DIV/0!	n/a	contamination	contamination	contamination	40	#DIV/0!	#DIV/0!	#DIV/0!	#DIV/0!	#DIV/0!	#DIV/0!
69	11	B4	2	5—6	47666.7	69166.7	116833	0.407989	0.592011	38750	58333.3	97083.3	0.399142	0.600858		RFP colonized	n/a	contamination	contamination	contamination		#DIV/0!		n/a	contamination	contamination	contamination		#DIV/0!		#DIV/0!	0	#DIV/0!	#DIV/0!
70	11	A2	2	5—6	47666.7	69166.7	116833	0.407989	0.592011	38750	58333.3	97083.3	0.399142	0.600858		aposymbiotic	n/a	contamination	contamination	contamination	40	#DIV/0!	#DIV/0!	n/a	contamination	contamination	contamination	40	#DIV/0!	#DIV/0!	#DIV/0!	#DIV/0!	#DIV/0!	#DIV/0!
71	11	A4	2	5—6	47666.7	69166.7	116833	0.407989	0.592011	38750	58333.3	97083.3	0.399142	0.600858		aposymbiotic	n/a	contamination	contamination	contamination		#DIV/0!		n/a	contamination	contamination	contamination		#DIV/0!		#DIV/0!	0	#DIV/0!	#DIV/0!
72	11	B2	2	5—6	47666.7	69166.7	116833	0.407989	0.592011	38750	58333.3	97083.3	0.399142	0.600858		aposymbiotic	n/a	contamination	contamination	contamination	40	#DIV/0!	#DIV/0!	n/a	contamination	contamination	contamination	40	#DIV/0!	#DIV/0!	#DIV/0!	#DIV/0!	#DIV/0!	#DIV/0!
73	11	D1	2	5—6	47666.7	69166.7	116833	0.407989	0.592011	38750	58333.3	97083.3	0.399142	0.600858		aposymbiotic	0	0	0	0	40	0	0	0	0	0	0	40	0	0	0	0	#DIV/0!	#DIV/0!
74	11	B3	2	5—6	47666.7	69166.7	116833	0.407989	0.592011	38750	58333.3	97083.3	0.399142	0.600858		aposymbiotic	n/a	contamination	contamination	contamination	40	#DIV/0!	#DIV/0!	n/a	contamination	contamination	contamination	40	#DIV/0!	#DIV/0!	#DIV/0!	#DIV/0!	#DIV/0!	#DIV/0!
75	11	A3	2	5—6	47666.7	69166.7	116833	0.407989	0.592011	38750	58333.3	97083.3	0.399142	0.600858		GFP colonized	2	55	80	64	40	165.833	49750	1	91	100	106	40	24.75	7425	190.583	57175	0.870136	0.129864
76	11	C1	2	5—6	47666.7	69166.7	116833	0.407989	0.592011	38750	58333.3	97083.3	0.399142	0.600858		colonized	1	122	88	contamination	40	26.25	7875	1	74	69	contamination	40	17.875	5362.5	44.125	13237.5	0.594901	0.405099
77	11	C2	2	5—6	47666.7	69166.7	116833	0.407989	0.592011	38750	58333.3	97083.3	0.399142	0.600858		GFP colonized	1	24	11	10	40	3.75	1125	1	19	22	19	40	5	1500	8.75	2625	0.428571	0.571429
78	11	C3	2	5—6	47666.7	69166.7	116833	0.407989	0.592011	38750	58333.3	97083.3	0.399142	0.600858		n/a	2	66	46	47	40	132.5	39750	2	27	22	23	40	60	18000	192.5	57750	0.688312	0.311688
79	11	C5	2	5—6	47666.7	69166.7	116833	0.407989	0.592011	38750	58333.3	97083.3	0.399142	0.600858		colonized	1	2	0	0	40	0.166667	50	1	0	0	0	40	0	0	0.166667	50	1	0
82	11	A2	1	5—6	473333	506667	980000	0.482993	0.517007	425000	540000	965000	0.440415	0.559585		slightly colonized; bad squash	1	3	3	4	40	0.833333	250	1	1	1	2	40	0.333333	100	1.16667	350	0.714286	0.285714
84	11	B5	1	5—6	473333	506667	980000	0.482993	0.517007	425000	540000	965000	0.440415	0.559585		Aposymbiotic	0	0	0	0	40	0	0	0	0	0	0	40	0	0	0	0	#DIV/0!	#DIV/0!
85	11	D2	1	5—6	473333	506667	980000	0.482993	0.517007	425000	540000	965000	0.440415	0.559585		Aposymbiotic	0	Contamination	Contamination	Contamination	40	#DIV/0!	#DIV/0!	0	Contamination	Contamination	Contamination	40	#DIV/0!	#DIV/0!	#DIV/0!	#DIV/0!	#DIV/0!	#DIV/0!
86	11	C2	1	5—6	473333	506667	980000	0.482993	0.517007	425000	540000	965000	0.440415	0.559585		colonized	1	133	121	134	40	32.3333	9700	1	61	62	57	40	15	4500	47.3333	14200	0.683099	0.316901
87	23	1	4	2—3	215.833	150.833	366.667	0.588636	0.411364	377.5	300.833	678.333	0.556511	0.443489		GFP only	0	0	0	0	40	0	0	0	0	0	0	40	0	0	0	0	#DIV/0!	#DIV/0!
88	23	2	4	2—3	215.833	150.833	366.667	0.588636	0.411364	377.5	300.833	678.333	0.556511	0.443489		aposymbiotic	0	0	0	0	40	0	0	0	0	0	0	40	0	0	0	0	#DIV/0!	#DIV/0!
89	23	3	4	2—3	215.833	150.833	366.667	0.588636	0.411364	377.5	300.833	678.333	0.556511	0.443489		both GFP and RFP	1	29	29	38	40	8	2400	0	88	88	93	40	2.24167	672.5	10.2417	3072.5	0.781123	0.218877
90	23	4	4	2—3	215.833	150.833	366.667	0.588636	0.411364	377.5	300.833	678.333	0.556511	0.443489		lots of RFP, some GFP	2	101	104	88	40	244.167	73250	2	137	142	128	40	339.167	101750	583.333	175000	0.418571	0.581429
91	23	5	4	2—3	215.833	150.833	366.667	0.588636	0.411364	377.5	300.833	678.333	0.556511	0.443489		aposymbiotic	0	0	0	0	40	0	0	0	0	0	0	40	0	0	0	0	#DIV/0!	#DIV/0!
92	23	6	4	2—3	215.833	150.833	366.667	0.588636	0.411364	377.5	300.833	678.333	0.556511	0.443489		equal amounts RFP and GFP	0	12	13	12	40	0.308333	92.5	0	8	7	10	40	0.208333	62.5	0.516667	155	0.596774	0.403226
93	23	7	4	2—3	215.833	150.833	366.667	0.588636	0.411364	377.5	300.833	678.333	0.556511	0.443489		aposymbiotic	0	0	0	0	40	0	0	0	0	0	0	40	0	0	0	0	#DIV/0!	#DIV/0!
94	23	8	4	2—3	215.833	150.833	366.667	0.588636	0.411364	377.5	300.833	678.333	0.556511	0.443489		equal amounts RFP and GFP	1	54	69	80	40	16.9167	5075	1	65	65	70	40	16.6667	5000	33.5833	10075	0.503722	0.496278
95	23	9	4	2—3	215.833	150.833	366.667	0.588636	0.411364	377.5	300.833	678.333	0.556511	0.443489		RFP only	0	0	0	0	40	0	0	0	113	133	139	40	3.20833	962.5	3.20833	962.5	0	1
96	23	10	4	2—3	215.833	150.833	366.667	0.588636	0.411364	377.5	300.833	678.333	0.556511	0.443489		both GFP and RFP	4	24	19	13	40	4666.67	1400000	4	36	26	44	40	8833.33	2650000	13500	4050000	0.345679	0.654321
97	23	11	4	2—3	215.833	150.833	366.667	0.588636	0.411364	377.5	300.833	678.333	0.556511	0.443489		GFP only	0	40	42	30	40	0.933333	280	0	0	0	0	40	0	0	0.933333	280	1	0
98	23	12	4	2—3	215.833	150.833	366.667	0.588636	0.411364	377.5	300.833	678.333	0.556511	0.443489		both GFP and RFP	1	88	81	65	40	19.5	5850	1	111	118	93	40	26.8333	8050	46.3333	13900	0.420863	0.579137
99	23	13	4	2—3	215.833	150.833	366.667	0.588636	0.411364	377.5	300.833	678.333	0.556511	0.443489		equal amounts RFP and GFP	2	59	71	74	40	170	51000	2	127	120	131	40	315	94500	485	145500	0.350515	0.649485
100	23	14	4	2—3	215.833	150.833	366.667	0.588636	0.411364	377.5	300.833	678.333	0.556511	0.443489		aposymbiotic	0	0	0	0	40	0	0	0	0	0	0	40	0	0	0	0	#DIV/0!	#DIV/0!
101	23	1	5	1—2	22	18.9167	40.9167	0.537678	0.462322	34.4167	28.6667	63.0833	0.545575	0.454425		GFP only	2	253	275	250	40	648.333	194500	0	0	0	0	40	0	0	648.333	194500	1	0
102	23	2	5	1—2	22	18.9167	40.9167	0.537678	0.462322	34.4167	28.6667	63.0833	0.545575	0.454425		GFP only	0	212	202	191	40	5.04167	1512.5	0	0	0	0	40	0	0	5.04167	1512.5	1	0
103	23	3	5	1—2	22	18.9167	40.9167	0.537678	0.462322	34.4167	28.6667	63.0833	0.545575	0.454425		RFP only	0	0	0	0	40	0	0	2	27	24	23	40	61.6667	18500	61.6667	18500	0	1
104	23	4	5	1—2	22	18.9167	40.9167	0.537678	0.462322	34.4167	28.6667	63.0833	0.545575	0.454425		apo	0	0	0	0	40	0	0	0	0	0	0	40	0	0	0	0	#DIV/0!	#DIV/0!
105	23	5	5	1—2	22	18.9167	40.9167	0.537678	0.462322	34.4167	28.6667	63.0833	0.545575	0.454425		apo	0	0	0	0	40	0	0	0	0	0	0	40	0	0	0	0	#DIV/0!	#DIV/0!
106	23	6	5	1—2	22	18.9167	40.9167	0.537678	0.462322	34.4167	28.6667	63.0833	0.545575	0.454425		apo	0	0	0	0	40	0	0	0	0	0	0	40	0	0	0	0	#DIV/0!	#DIV/0!
107	25	A2	5	1—2	10.75	9.66667	20.4167	0.526531	0.473469	12.5	10	22.5	0.555556	0.444444		RFP only	0	0	0	0	40	0	0	0	6	11	11	40	0.233333	70	0.233333	70	0	1
108	25	B1	5	1—2	10.75	9.66667	20.4167	0.526531	0.473469	12.5	10	22.5	0.555556	0.444444		n/a	3	22	22	20	40	533.333	160000	0	0	0	0	40	0	0	533.333	160000	1	0
109	25	B5	5	1—2	10.75	9.66667	20.4167	0.526531	0.473469	12.5	10	22.5	0.555556	0.444444		RFP only	0	0	0	0	40	0	0	0	0	0	0	40	0	0	0	0	#DIV/0!	#DIV/0!
110	25	C1	5	1—2	10.75	9.66667	20.4167	0.526531	0.473469	12.5	10	22.5	0.555556	0.444444		aposymbiotic	0	0	0	0	40	0	0	0	0	0	0	40	0	0	0	0	#DIV/0!	#DIV/0!
111	25	C2	5	1—2	10.75	9.66667	20.4167	0.526531	0.473469	12.5	10	22.5	0.555556	0.444444		aposymbiotic	0	0	0	0	40	0	0	0	0	0	0	40	0	0	0	0	#DIV/0!	#DIV/0!
112	25	C3	5	1—2	10.75	9.66667	20.4167	0.526531	0.473469	12.5	10	22.5	0.555556	0.444444		aposymbiotic	0	0	0	0	40	0	0	0	0	0	0	40	0	0	0	0	#DIV/0!	#DIV/0!
113	25	C4	5	1—2	10.75	9.66667	20.4167	0.526531	0.473469	12.5	10	22.5	0.555556	0.444444		aposymbiotic	0	0	0	0	40	0	0	0	0	0	0	40	0	0	0	0	#DIV/0!	#DIV/0!
114	25	C6	5	1—2	10.75	9.66667	20.4167	0.526531	0.473469	12.5	10	22.5	0.555556	0.444444		aposymbiotic	0	0	0	0	40	0	0	0	0	0	0	40	0	0	0	0	#DIV/0!	#DIV/0!
115	25	D3	5	1—2	10.75	9.66667	20.4167	0.526531	0.473469	12.5	10	22.5	0.555556	0.444444		aposymbiotic	0	0	0	0	40	0	0	0	0	0	0	40	0	0	0	0	#DIV/0!	#DIV/0!
116	25	A2	4	2—3	95.8333	101.667	197.5	0.485232	0.514768	95.8333	116.667	212.5	0.45098	0.54902		GFP only	4	39	48	37	40	10333.3	3100000	0	0	0	0	40	0	0	10333.3	3100000	1	0
117	25	A3	4	2—3	95.8333	101.667	197.5	0.485232	0.514768	95.8333	116.667	212.5	0.45098	0.54902		RFP only	0	0	0	0	40	0	0	4	77	62	89	40	19000	5700000	19000	5700000	0	1
118	25	A4	4	2—3	95.8333	101.667	197.5	0.485232	0.514768	95.8333	116.667	212.5	0.45098	0.54902		aposymbiotic	0	0	0	0	40	0	0	0	0	0	0	40	0	0	0	0	#DIV/0!	#DIV/0!
119	25	B1	4	2—3	95.8333	101.667	197.5	0.485232	0.514768	95.8333	116.667	212.5	0.45098	0.54902		GFP only	3	188	192	n/a- not spotted by mistake	40	4750	1425000	0	0	0	0	40	0	0	4750	1425000	1	0
120	25	B2	4	2—3	95.8333	101.667	197.5	0.485232	0.514768	95.8333	116.667	212.5	0.45098	0.54902		aposymbiotic	0	0	0	0	40	0	0	0	0	0	0	40	0	0	0	0	#DIV/0!	#DIV/0!
121	25	B3	4	2—3	95.8333	101.667	197.5	0.485232	0.514768	95.8333	116.667	212.5	0.45098	0.54902		aposymbiotic	0	0	0	0	40	0	0	0	0	0	0	40	0	0	0	0	#DIV/0!	#DIV/0!
122	25	B4	4	2—3	95.8333	101.667	197.5	0.485232	0.514768	95.8333	116.667	212.5	0.45098	0.54902		aposymbiotic	0	0	0	0	40	0	0	0	0	0	0	40	0	0	0	0	#DIV/0!	#DIV/0!
123	25	C1	4	2—3	95.8333	101.667	197.5	0.485232	0.514768	95.8333	116.667	212.5	0.45098	0.54902		aposymbiotic	0	0	0	0	40	0	0	0	0	0	0	40	0	0	0	0	#DIV/0!	#DIV/0!
124	25	C2	4	2—3	95.8333	101.667	197.5	0.485232	0.514768	95.8333	116.667	212.5	0.45098	0.54902		n/a	2	96	97	85	40	231.667	69500	2	66	69	35	40	141.667	42500	373.333	112000	0.620536	0.379464
125	25	C3	4	2—3	95.8333	101.667	197.5	0.485232	0.514768	95.8333	116.667	212.5	0.45098	0.54902		n/a	3	73	62	59	40	1616.67	485000	3	36	33	38	40	891.667	267500	2508.33	752500	0.644518	0.355482
126	29	A1	5	1—2	29.4167	10.6667	40.0833	0.733888	0.266112	50.25	24.9167	75.1667	0.668514	0.331486		50/50 GFP and RFP	3	54	44	50	40	1233.33	370000	2	166	160	187	40	427.5	128250	1660.83	498250	0.742599	0.257401
127	29	A2	5	1—2	29.4167	10.6667	40.0833	0.733888	0.266112	50.25	24.9167	75.1667	0.668514	0.331486		aposymbiotic	0	0	0	0	40	0	0	0	0	0	0	40	0	0	0	0	#DIV/0!	#DIV/0!
128	29	A3	5	1—2	29.4167	10.6667	40.0833	0.733888	0.266112	50.25	24.9167	75.1667	0.668514	0.331486		GFP only	4	28	28	23	40	6583.33	1975000	0	0	0	0	40	0	0	6583.33	1975000	1	0
129	29	A4	5	1—2	29.4167	10.6667	40.0833	0.733888	0.266112	50.25	24.9167	75.1667	0.668514	0.331486		aposymbiotic	0	0	0	0	40	0	0	0	0	0	0	40	0	0	0	0	#DIV/0!	#DIV/0!
130	29	A5	5	1—2	29.4167	10.6667	40.0833	0.733888	0.266112	50.25	24.9167	75.1667	0.668514	0.331486		GFP only; more advanced colonization than the other nymphs	3	33	47	22	40	850	255000	0	0	0	0	40	0	0	850	255000	1	0
131	29	B2	5	1—2	29.4167	10.6667	40.0833	0.733888	0.266112	50.25	24.9167	75.1667	0.668514	0.331486		RFP only	0	0	0	0	40	0	0	4	68	73	62	40	16916.7	5075000	16916.7	5075000	0	1
132	29	B3	5	1—2	29.4167	10.6667	40.0833	0.733888	0.266112	50.25	24.9167	75.1667	0.668514	0.331486		aposymbiotic	0	0	0	0	40	0	0	0	0	0	0	40	0	0	0	0	#DIV/0!	#DIV/0!
133	29	B4	5	1—2	29.4167	10.6667	40.0833	0.733888	0.266112	50.25	24.9167	75.1667	0.668514	0.331486		about 60% RFP/40% GFP	4	28	19	32	40	6583.33	1975000	4	39	46	54	40	11583.3	3475000	18166.7	5450000	0.362385	0.637615
134	29	B5	5	1—2	29.4167	10.6667	40.0833	0.733888	0.266112	50.25	24.9167	75.1667	0.668514	0.331486		aposymbiotic	0	0	0	0	40	0	0	0	0	0	0	40	0	0	0	0	#DIV/0!	#DIV/0!
135	29	C1	5	1—2	29.4167	10.6667	40.0833	0.733888	0.266112	50.25	24.9167	75.1667	0.668514	0.331486		RFP only; early colonization	0	0	0	0	40	0	0	3	99	97	98	40	2450	735000	2450	735000	0	1
136	29	C2	5	1—2	29.4167	10.6667	40.0833	0.733888	0.266112	50.25	24.9167	75.1667	0.668514	0.331486		GFP only	1	84	103	74	40	21.75	6525	0	0	0	0	40	0	0	21.75	6525	1	0
137	29	C3	5	1—2	29.4167	10.6667	40.0833	0.733888	0.266112	50.25	24.9167	75.1667	0.668514	0.331486		molted to L3 4/7/2022. both RFP and GFP	3	48	50	26	40	1033.33	310000	2	86	70	63	40	182.5	54750	1215.83	364750	0.849897	0.150103
138	29	C4	5	1—2	29.4167	10.6667	40.0833	0.733888	0.266112	50.25	24.9167	75.1667	0.668514	0.331486		both RFP and GFP	3	27	30	35	40	766.667	230000	3	55	55	60	40	1416.67	425000	2183.33	655000	0.351145	0.648855
139	29	D1	5	1—2	29.4167	10.6667	40.0833	0.733888	0.266112	50.25	24.9167	75.1667	0.668514	0.331486		early colonization; mostly RFP, little GFP	2	111	89	100	40	250	75000	3	72	71	58	40	1675	502500	1925	577500	0.12987	0.87013
140	29	D2	5	1—2	29.4167	10.6667	40.0833	0.733888	0.266112	50.25	24.9167	75.1667	0.668514	0.331486		GFP only	3	76	75	58	40	1741.67	522500	0	0	0	0	40	0	0	1741.67	522500	1	0
141	29	D3	5	1—2	29.4167	10.6667	40.0833	0.733888	0.266112	50.25	24.9167	75.1667	0.668514	0.331486		GFP only	3	253	229	217	40	5825	1747500	0	0	0	0	40	0	0	5825	1747500	1	0
142	29	D4	5	1—2	29.4167	10.6667	40.0833	0.733888	0.266112	50.25	24.9167	75.1667	0.668514	0.331486		RFP only	3	0	0	0	40	0	0	3	196	201	151	40	4566.67	1.37e+06	4566.67	1.37e+06	0	1
143	29	A1	0.5 Dil 5	1—2	16.3333	9.16667	25.5	0.640523	0.359477	28.0833	16	44.0833	0.637051	0.362949		aposymbiotic	0	0	0	0	40	0	0	0	0	0	0	40	0	0	0	0	#DIV/0!	#DIV/0!
144	29	A2	0.5 Dil 5	1—2	16.3333	9.16667	25.5	0.640523	0.359477	28.0833	16	44.0833	0.637051	0.362949		aposymbiotic	0	0	0	0	40	0	0	0	0	0	0	40	0	0	0	0	#DIV/0!	#DIV/0!
145	29	A3	0.5 Dil 5	1—2	16.3333	9.16667	25.5	0.640523	0.359477	28.0833	16	44.0833	0.637051	0.362949		aposymbiotic	0	0	0	0	40	0	0	0	0	0	0	40	0	0	0	0	#DIV/0!	#DIV/0!
146	29	A4	0.5 Dil 5	1—2	16.3333	9.16667	25.5	0.640523	0.359477	28.0833	16	44.0833	0.637051	0.362949		RFP only	0	0	0	0	40	0	0	2	48	40	53	40	117.5	35250	117.5	35250	0	1
147	29	B1	0.5 Dil 5	1—2	16.3333	9.16667	25.5	0.640523	0.359477	28.0833	16	44.0833	0.637051	0.362949		RFP only	0	0	0	0	40	0	0	3	39	45	29	40	941.667	282500	941.667	282500	0	1
148	29	B2	0.5 Dil 5	1—2	16.3333	9.16667	25.5	0.640523	0.359477	28.0833	16	44.0833	0.637051	0.362949		aposymbiotic	0	0	0	0	40	0	0	0	0	0	0	40	0	0	0	0	#DIV/0!	#DIV/0!
149	29	B3	0.5 Dil 5	1—2	16.3333	9.16667	25.5	0.640523	0.359477	28.0833	16	44.0833	0.637051	0.362949		aposymbiotic	0	0	0	0	40	0	0	0	0	0	0	40	0	0	0	0	#DIV/0!	#DIV/0!
150	29	B4	0.5 Dil 5	1—2	16.3333	9.16667	25.5	0.640523	0.359477	28.0833	16	44.0833	0.637051	0.362949		3:1 GFP to RFP	2	67	63	57	40	155.833	46750	1	61	50	40	40	12.5833	3775	168.417	50525	0.925285	0.0747155
151	29	B5	0.5 Dil 5	1—2	16.3333	9.16667	25.5	0.640523	0.359477	28.0833	16	44.0833	0.637051	0.362949		aposymbiotic	0	0	0	0	40	0	0	0	0	0	0	40	0	0	0	0	#DIV/0!	#DIV/0!
152	29	C1	0.5 Dil 5	1—2	16.3333	9.16667	25.5	0.640523	0.359477	28.0833	16	44.0833	0.637051	0.362949		aposymbiotic	0	0	0	0	40	0	0	0	0	0	0	40	0	0	0	0	#DIV/0!	#DIV/0!
153	29	C2	0.5 Dil 5	1—2	16.3333	9.16667	25.5	0.640523	0.359477	28.0833	16	44.0833	0.637051	0.362949		aposymbiotic	0	0	0	0	40	0	0	0	0	0	0	40	0	0	0	0	#DIV/0!	#DIV/0!
154	29	C3	0.5 Dil 5	1—2	16.3333	9.16667	25.5	0.640523	0.359477	28.0833	16	44.0833	0.637051	0.362949		molted to L3 4/8/2022. mostly RFP, some GFP	2	96	93	87	40	230	69000	2	161	172	171	40	420	126000	650	195000	0.353846	0.646154
155	29	C4	0.5 Dil 5	1—2	16.3333	9.16667	25.5	0.640523	0.359477	28.0833	16	44.0833	0.637051	0.362949		aposymbiotic	0	0	0	0	40	0	0	0	0	0	0	40	0	0	0	0	#DIV/0!	#DIV/0!
156	29	D1	0.5 Dil 5	1—2	16.3333	9.16667	25.5	0.640523	0.359477	28.0833	16	44.0833	0.637051	0.362949		GFP only	3	67	64	76	40	1725	517500	0	0	0	0	40	0	0	1725	517500	1	0
157	29	D2	0.5 Dil 5	1—2	16.3333	9.16667	25.5	0.640523	0.359477	28.0833	16	44.0833	0.637051	0.362949		aposymbiotic	0	0	0	0	40	0	0	0	0	0	0	40	0	0	0	0	#DIV/0!	#DIV/0!
158	29	D3	0.5 Dil 5	1—2	16.3333	9.16667	25.5	0.640523	0.359477	28.0833	16	44.0833	0.637051	0.362949		aposymbiotic	0	0	0	0	40	0	0	0	0	0	0	40	0	0	0	0	#DIV/0!	#DIV/0!
159	29	D4	0.5 Dil 5	1—2	16.3333	9.16667	25.5	0.640523	0.359477	28.0833	16	44.0833	0.637051	0.362949		aposymbiotic	0	0	0	0	40	0	0	0	0	0	0	40	0	0	0	0	#DIV/0!	#DIV/0!
160	29	D5	0.5 Dil 5	1—2	16.3333	9.16667	25.5	0.640523	0.359477	28.0833	16	44.0833	0.637051	0.362949		aposymbiotic	0	0	0	0	40	0	0	0	0	0	0	40	0	0	0	0	#DIV/0!	#DIV/0!
