# Supplementary material for: Ecological drift during colonization drives within-host and between-host heterogeneity in an animal-associated symbiont
Source: PLoS Biol. 2024 Apr 25;22(4):e3002304. doi: 10.1371/journal.pbio.3002304 (PMC11075893; doi:10.1371/journal.pbio.3002304)
Supplement: S2 Table — Bimodality coefficients, population variances, species-level Fst, and dip statistics calculated from competition trials between SQ4a GFPmut3 and GA-OX1 RFP. (XLSX) [file pbio.3002304.s008.xlsx]

## Sheet: Sheet1
S2 Table. Bimodality coefficients, population variances, species-level Fst, and dip statistics calculated from competition trials between SQ4a GFPmut3 and GA-OX1 RFP.
Inoculum Density	Sample Size	Bimodality Coefficient	Variance	Fst (GA-OX1 RFP)	Dip Statistic
10^1	18	0.742447	0.248257	0.993041	0.241909
10^2	17	0.704132	0.218596	0.904198	0.176471
10^3	17	0.542865	0.132692	0.545346	0.117647
10^4	16	0.461446	0.0368986	0.211145	0.0720613
