# Supplementary material for: Ecological drift during colonization drives within-host and between-host heterogeneity in an animal-associated symbiont
Source: PLoS Biol. 2024 Apr 25;22(4):e3002304. doi: 10.1371/journal.pbio.3002304 (PMC11075893; doi:10.1371/journal.pbio.3002304)
Supplement: S3 Code — (R) [file pbio.3002304.s020.R]

pacman::p_load(tidyverse, readxl,janitor, mgcv, caret, multcompView,car)
"coculture_pivot_df" <- read_excel("S3 Data - Coculture_competition.xlsx")

"coculture_summarypivot_df" <- coculture_pivot_df[-c(81:84),] %>% 
  group_by(Strain,Competition,Time) %>%
  mutate(avgcfu= mean(cfu, na.rm = TRUE)) %>% 
  mutate(avgcfu_log = log10(avgcfu)) %>% 
  mutate(cfu_log = log10(cfu)) %>% 
  mutate(sdcfu = sd(cfu, na.rm = TRUE)) %>%
  mutate(sdcfu_log = log10(sdcfu)) %>% 
  clean_names()

coculture_summarypivot_df_24<-
  coculture_summarypivot_df %>% 
  filter(time==24) 

coculture_summarypivot_df_24 %>% 
  ggplot(mapping = aes(strain,cfu_log, fill = competition))+
  geom_boxplot()+
  geom_point(position = position_jitterdodge(0.2), size = 4, shape = 1)+
  scale_fill_manual(values = c("white","#696969"), labels=c("Heterospecific competitor","Isogenic competitor"))+
  theme_classic(base_size=25)+
  labs(#title = "In vitro competition assays",
       x = "Strain",
       y = expression('Abundance (log'[10]* 'CFU/�L)'))+
  theme(plot.title = element_text(hjust = 0.5)) +
  theme(text = element_text(size=30))+
  theme(legend.title = element_blank())+
  theme(legend.position = c(0.20, 0.2))

ggsave("~/Fig3A-new.tiff", height=8, width=13, limitsize=FALSE)
