# Supplementary material for: Ecological drift during colonization drives within-host and between-host heterogeneity in an animal-associated symbiont
Source: PLoS Biol. 2024 Apr 25;22(4):e3002304. doi: 10.1371/journal.pbio.3002304 (PMC11075893; doi:10.1371/journal.pbio.3002304)
Supplement: S3 Data — SQ4a. Colony count data of counterlabeled GA-OX1 and SQ4a strains grown in liquid coculture over 24 h, including both same-strain and interspecific combinations. (XLSX) [file pbio.3002304.s013.xlsx]

## Sheet: Sheet1
Strain	Color	Trial	Competition	Time	cfu
GAOX1	gfp	1	Coculture	0	350
GAOX1	gfp	1	Coculture	2	733.333
GAOX1	gfp	1	Coculture	6
GAOX1	gfp	1	Coculture	24	4.13333e+06
GAOX1	dtomato	1	Coculture	0	1033.33
GAOX1	dtomato	1	Coculture	2	2816.67
GAOX1	dtomato	1	Coculture	6
GAOX1	dtomato	1	Coculture	24	3.08333e+06
SQ4a	gfp	1	Coculture	0	1308.33
SQ4a	gfp	1	Coculture	2	425
SQ4a	gfp	1	Coculture	6
SQ4a	gfp	1	Coculture	24	1
SQ4a	dtomato	1	Coculture	0	2625
SQ4a	dtomato	1	Coculture	2	1683.33
SQ4a	dtomato	1	Coculture	6
SQ4a	dtomato	1	Coculture	24	1
GAOX1	gfp	1	Isolated	0	358.333
GAOX1	gfp	1	Isolated	2	925
GAOX1	gfp	1	Isolated	6
GAOX1	gfp	1	Isolated	24	750000
GAOX1	dtomato	1	Isolated	0	1425
GAOX1	dtomato	1	Isolated	2	3158.33
GAOX1	dtomato	1	Isolated	6
GAOX1	dtomato	1	Isolated	24	2.54167e+06
SQ4a	gfp	1	Isolated	0	1425
SQ4a	gfp	1	Isolated	2	341.667
SQ4a	gfp	1	Isolated	6
SQ4a	gfp	1	Isolated	24	650000
SQ4a	dtomato	1	Isolated	0	2141.67
SQ4a	dtomato	1	Isolated	2	1675
SQ4a	dtomato	1	Isolated	6
SQ4a	dtomato	1	Isolated	24	2.10833e+06
GAOX1	gfp	2	Isolated	0	1425
GAOX1	gfp	2	Isolated	2	4325
GAOX1	gfp	2	Isolated	6
GAOX1	gfp	2	Isolated	24	8500000
SQ4a	dtomato	2	Isolated	0	2250
SQ4a	dtomato	2	Isolated	2	2670.83
SQ4a	dtomato	2	Isolated	6
SQ4a	dtomato	2	Isolated	24	3.66667e+06
GAOX1	gfp	2	Isolated	0	1325
GAOX1	gfp	2	Isolated	2	4370.83
GAOX1	gfp	2	Isolated	6
GAOX1	gfp	2	Isolated	24	8.33333e+06
SQ4a	dtomato	2	Isolated	0	2479.17
SQ4a	dtomato	2	Isolated	2	3083.33
SQ4a	dtomato	2	Isolated	6
SQ4a	dtomato	2	Isolated	24	1.58333e+06
GAOX1	dtomato	3	Isolated	0	500
GAOX1	dtomato	3	Isolated	2	3079.17
GAOX1	dtomato	3	Isolated	6
GAOX1	dtomato	3	Isolated	24	2562500
SQ4a	gfp	3	Isolated	0	1012
SQ4a	gfp	3	Isolated	2	337.5
SQ4a	gfp	3	Isolated	6
SQ4a	gfp	3	Isolated	24	408333
GAOX1	gfp	3	Isolated	0	333
GAOX1	gfp	3	Isolated	2	1212.5
GAOX1	gfp	3	Isolated	6
GAOX1	gfp	3	Isolated	24	583333
SQ4a	dtomato	3	Isolated	0	2237.5
SQ4a	dtomato	3	Isolated	2	1920.83
SQ4a	dtomato	3	Isolated	6
SQ4a	dtomato	3	Isolated	24	2637500
GAOX1	dtomato	3	Coculture	0	1058.33
GAOX1	dtomato	3	Coculture	2	2991.67
GAOX1	dtomato	3	Coculture	6
GAOX1	dtomato	3	Coculture	24	2.66667e+06
SQ4a	gfp	3	Coculture	0	1237.5
SQ4a	gfp	3	Coculture	2	379.167
SQ4a	gfp	3	Coculture	6
SQ4a	gfp	3	Coculture	24	1
GAOX1	gfp	3	Coculture	0	379.167
GAOX1	gfp	3	Coculture	2	741.667
GAOX1	gfp	3	Coculture	6
GAOX1	gfp	3	Coculture	24	3900000
SQ4a	dtomato	3	Coculture	0	2691.67
SQ4a	dtomato	3	Coculture	2	1595.83
SQ4a	dtomato	3	Coculture	6
SQ4a	dtomato	3	Coculture	24	1
GAOX1	dtomato	4	Isolated	0	0
GAOX1	dtomato	4	Isolated	2	0
GAOX1	dtomato	4	Isolated	6	0
GAOX1	dtomato	4	Isolated	24	0
SQ4a	gfp	4	Isolated	0	4108.33
SQ4a	gfp	4	Isolated	2	3037.5
SQ4a	gfp	4	Isolated	6	8083.33
SQ4a	gfp	4	Isolated	24	1.25417e+06
GAOX1	gfp	4	Isolated	0	2166.67
GAOX1	gfp	4	Isolated	2	9333.33
GAOX1	gfp	4	Isolated	6	15083.3
GAOX1	gfp	4	Isolated	24	3.16667e+06
SQ4a	dtomato	4	Isolated	0	4550
SQ4a	dtomato	4	Isolated	2	5270.83
SQ4a	dtomato	4	Isolated	6	12916.7
SQ4a	dtomato	4	Isolated	24	1.70833e+06
GAOX1	dtomato	4	Coculture	0	4229.17
GAOX1	dtomato	4	Coculture	2	0
GAOX1	dtomato	4	Coculture	6	166.667
GAOX1	dtomato	4	Coculture	24	820833
SQ4a	gfp	4	Coculture	0	4.16667
SQ4a	gfp	4	Coculture	2	3083.33
SQ4a	gfp	4	Coculture	6	7337.5
SQ4a	gfp	4	Coculture	24	1487500
GAOX1	gfp	4	Coculture	0	2133.33
GAOX1	gfp	4	Coculture	2	15333.3
GAOX1	gfp	4	Coculture	6	40250
GAOX1	gfp	4	Coculture	24	429167
SQ4a	dtomato	4	Coculture	0	3775
SQ4a	dtomato	4	Coculture	2	5916.67
SQ4a	dtomato	4	Coculture	6	18083.3
SQ4a	dtomato	4	Coculture	24	1
GAOX1	dtomato	5	Isolated	0	1025
GAOX1	dtomato	5	Isolated	2
GAOX1	dtomato	5	Isolated	6
GAOX1	dtomato	5	Isolated	24	1.73333e+06
SQ4a	gfp	5	Isolated	0	725
SQ4a	gfp	5	Isolated	2
SQ4a	gfp	5	Isolated	6
SQ4a	gfp	5	Isolated	24	925000
GAOX1	gfp	5	Isolated	0	875
GAOX1	gfp	5	Isolated	2
GAOX1	gfp	5	Isolated	6
GAOX1	gfp	5	Isolated	24	1.80833e+06
SQ4a	dtomato	5	Isolated	0	775
SQ4a	dtomato	5	Isolated	2
SQ4a	dtomato	5	Isolated	6
SQ4a	dtomato	5	Isolated	24	1.55833e+06
GAOX1	dtomato	5	Coculture	0	941.667
GAOX1	dtomato	5	Coculture	2
GAOX1	dtomato	5	Coculture	6
GAOX1	dtomato	5	Coculture	24	4.43333e+06
SQ4a	gfp	5	Coculture	0	1200
SQ4a	gfp	5	Coculture	2
SQ4a	gfp	5	Coculture	6
SQ4a	gfp	5	Coculture	24	1
GAOX1	gfp	5	Coculture	0	1266.67
GAOX1	gfp	5	Coculture	2
GAOX1	gfp	5	Coculture	6
GAOX1	gfp	5	Coculture	24	3.99167e+06
SQ4a	dtomato	5	Coculture	0	925
SQ4a	dtomato	5	Coculture	2
SQ4a	dtomato	5	Coculture	6
SQ4a	dtomato	5	Coculture	24	1
