# Supplementary material for: Ecological drift during colonization drives within-host and between-host heterogeneity in an animal-associated symbiont
Source: PLoS Biol. 2024 Apr 25;22(4):e3002304. doi: 10.1371/journal.pbio.3002304 (PMC11075893; doi:10.1371/journal.pbio.3002304)
Supplement: S3 Table — Bimodality coefficients, population variances, species-level Fst, and dip statistics calculated from competition trials between GA-OX1 RFP and SQ4a sfGFP. (XLSX) [file pbio.3002304.s009.xlsx]

## Sheet: Sheet1
S3 Table. Bimodality coefficients, population variances, species-level Fst, and dip statistics calculated from competition trials between GA-OX1 RFP and SQ4a sfGFP.
Inoculum Density	Sample Size	Bimodality Coefficient	Variance	Fst (GA-OX1 RFP)	Dip Statistic
10^0 - 10^1	4	0.285714	0.1875	1	0.125
10^1 - 10^2	31	0.92418	0.0846813	0.982827	0.0462228
10^2 - 10^3	19	0.762845	0.234634	0.963504	0.189227
10^4 - 10^5	18	0.790632	0.132613	0.802514	0.0833333
