# Supplementary material for: Ecological drift during colonization drives within-host and between-host heterogeneity in an animal-associated symbiont
Source: PLoS Biol. 2024 Apr 25;22(4):e3002304. doi: 10.1371/journal.pbio.3002304 (PMC11075893; doi:10.1371/journal.pbio.3002304)
Supplement: S4 Data — Colony count data of SQ4a GFPmut3 and GA-OX1 RFP colonization trials from each insect, including insects from which no fluorescent colonies were recovered. (XLSX) [file pbio.3002304.s014.xlsx]

## Sheet: Sheet1
Index	Dilution_Category	Trial	L2_ID	sfGFP_Inoculum_before	dTomato_Inoculum_before	Inoculum_Density_Before	percent_dTomato_before	sfGFP_Inoculum_after	dTomato_Inoculum_after	Inoculum_Density_After	percent_dTomato_after	Time	Crypt_phenotype	Dilution_Level	GFP_CFU_1	GFP_CFU_2	GFP_CFU_3	Spot_Volume_(uL)	GFP_CFU/uL	Total_GFP_CFU/sample	Dilution_Level	dTomato_CFU_1	dTomato_CFU_2	dTomato_CFU_3	Spot_Volume_(uL)	dTomato_CFU/uL	Total_dTomato_CFU/sample		Average_CFU/uL	Total_CFU/sample	percent_GFP_CFUs	percent_RFP_CFUs
1	4	30	A1	6916.67	2608.33	9525	0.273841	5700	3350	9050	0.370166	23:10:00	aposymbiotic	0	0	0	0	40	0	0	0	0	0	0	40	0	0		0	0	#DIV/0!	#DIV/0!
2	4	30	A2	6916.67	2608.33	9525	0.273841	5700	3350	9050	0.370166	23:22:00	mostly RFP	0	0	0	0	40	0	0	2	78	71	60	40	174.167	52250		71	60	0	1
3	4	30	A3	6916.67	2608.33	9525	0.273841	5700	3350	9050	0.370166	23:30:00	both GFP and RFP	2	17	23	19	40	49.1667	14750	2	77	79	70	40	188.333	56500		102	89	0.213483	0.786517
4	4	30	A4	6916.67	2608.33	9525	0.273841	5700	3350	9050	0.370166	23:35:00	aposymbiotic	0	0	0	0	40	0	0	0	0	0	0	40	0	0		0	0	#DIV/0!	#DIV/0!
5	4	30	A6	6916.67	2608.33	9525	0.273841	5700	3350	9050	0.370166	23:34:00	aposymbiotic	0	0	0	0	40	0	0	0	0	0	0	40	0	0		0	0	#DIV/0!	#DIV/0!
6	4	30	B1	6916.67	2608.33	9525	0.273841	5700	3350	9050	0.370166	23:50:00	aposymbiotic	0	0	0	0	40	0	0	0	0	0	0	40	0	0		0	0	#DIV/0!	#DIV/0!
7	4	30	B2	6916.67	2608.33	9525	0.273841	5700	3350	9050	0.370166	23:57:00	50/50 GFP and RFP	3	23	25	23	40	591.667	177500	2	106	105	120	40	275.833	82750		130	143	0.160839	0.839161
8	4	30	B4	6916.67	2608.33	9525	0.273841	5700	3350	9050	0.370166	00:05:00	aposymbiotic	3	0	1	2	40	25	7500	3	60	59	72	40	1591.67	477500		60	74	0.027027	0.972973
9	4	30	B6	6916.67	2608.33	9525	0.273841	5700	3350	9050	0.370166	00:12:00	mostly RFP	2	14	8	6	40	23.3333	7000	3	61	68	47	40	1466.67	440000		76	53	0.113208	0.886792
10	4	30	C1	6916.67	2608.33	9525	0.273841	5700	3350	9050	0.370166	00:27:00	both GFP and RFP	4	28	22	30	40	6666.67	2000000	3	107	118	131	40	2966.67	890000		140	161	0.186335	0.813665
11	4	30	C2	6916.67	2608.33	9525	0.273841	5700	3350	9050	0.370166	00:34:00	both GFP and RFP	3	69	52	60	40	1508.33	452500	3	41	35	32	40	900	270000		87	92	0.652174	0.347826
12	4	30	C3	6916.67	2608.33	9525	0.273841	5700	3350	9050	0.370166	00:41:00	both GFP and RFP	3	0	0	1	40	8.33333	2500	4	23	14	37	40	6166.67	1850000		14	38	0.0263158	0.973684
13	4	30	C4	6916.67	2608.33	9525	0.273841	5700	3350	9050	0.370166	00:57:00	mostly GFP + 5 RFP crypts	1	32	28	26	40	7.16667	2150	1	30	27	25	40	6.83333	2050		55	51	0.509804	0.490196
14	4	30	C5	6916.67	2608.33	9525	0.273841	5700	3350	9050	0.370166	00:55:00	both GFP and RFP	3	91	90	89	40	2250	675000	3	132	158	151	40	3675	1102500		248	240	0.370833	0.629167
15	4	30	C6	6916.67	2608.33	9525	0.273841	5700	3350	9050	0.370166	01:01:00	both GFP and RFP	0	0	0	0	40	0	0	3	89	87	94	40	2250	675000		87	94	0	1
16	4	30	D1	6916.67	2608.33	9525	0.273841	5700	3350	9050	0.370166	01:19:00	both GFP and RFP	2	38	30	41	40	90.8333	27250	3	79	73	72	40	1866.67	560000		103	113	0.362832	0.637168
17	4	30	D2	6916.67	2608.33	9525	0.273841	5700	3350	9050	0.370166	01:26:00	mostly GFP, some RFP	0	0	0	0	40	0	0	0	0	0	0	40	0	0		0	0	#DIV/0!	#DIV/0!
18	4	30	D3	6916.67	2608.33	9525	0.273841	5700	3350	9050	0.370166	01:33:00	mostly RFP, some GFP	2	4	9	5	40	15	4500	3	22	18	22	40	516.667	155000		27	27	0.185185	0.814815
19	4	30	D4	6916.67	2608.33	9525	0.273841	5700	3350	9050	0.370166	01:40:00	50/50 GFP and RFP	3	37	48	33	40	983.333	295000	3	130	103	101	40	2783.33	835000		151	134	0.246269	0.753731
20	4	30	D5	6916.67	2608.33	9525	0.273841	5700	3350	9050	0.370166	01:45:00	mostly RFP, some GFP	4	26	26	23	40	6250	1875000	4	20	22	25	40	5583.33	1675000		48	48	0.479167	0.520833
21	4	30	D6	6916.67	2608.33	9525	0.273841	5700	3350	9050	0.370166	01:52:00	50/50 GFP and RFP	2	12	10	9	40	25.8333	7750	2	143	141	107	40	325.833	97750		151	116	0.0775862	0.922414
22	3	30	A2	570.833	304.167	875	0.347619	523.333	304.167	827.5	0.367573	17:35:00	aposymbiotic	0	0	0	0	40	0	0	0	0	0	0	40	0	0		0	0	#DIV/0!	#DIV/0!
23	3	30	A5	570.833	304.167	875	0.347619	523.333	304.167	827.5	0.367573	17:39:00	GFP + 7 RFP crypts	2	69	75	60	40	170	51000	1	139	191	122	40	37.6667	11300		266	182	0.32967	0.67033
24	3	30	B1	570.833	304.167	875	0.347619	523.333	304.167	827.5	0.367573	13:52:00	aposymbiotic	0	0	0	0	40	0	0	0	0	0	0	40	0	0		0	0	#DIV/0!	#DIV/0!
25	3	30	B2	570.833	304.167	875	0.347619	523.333	304.167	827.5	0.367573	15:53:00	both RFP and GFP	2	20	15	13	40	40	12000	2	102	86	89	40	230.833	69250		101	102	0.127451	0.872549
26	3	30	B3	570.833	304.167	875	0.347619	523.333	304.167	827.5	0.367573	15:57:00	mostly GFP	2	17	8	13	40	31.6667	9500	2	129	131	136	40	330	99000		139	149	0.0872483	0.912752
27	3	30	B4	570.833	304.167	875	0.347619	523.333	304.167	827.5	0.367573	16:04:00	mostly GFP, 5 RFP crypts	2	57	52	69	40	148.333	44500	2	154	151	136	40	367.5	110250		203	205	0.336585	0.663415
28	3	30	B5	570.833	304.167	875	0.347619	523.333	304.167	827.5	0.367573	16:09:00	GFP only	2	69	52	62	40	152.5	45750	0	0	0	0	40	0	0		52	62	1	0
29	3	30	B6	570.833	304.167	875	0.347619	523.333	304.167	827.5	0.367573	17:30:00	GFP +2 RFP crypts	2	49	38	44	40	109.167	32750	1	70	93	88	40	20.9167	6275		131	132	0.333333	0.666667
30	3	30	C1	570.833	304.167	875	0.347619	523.333	304.167	827.5	0.367573	13:16:00	GFP only	2	135	107	118	40	300	90000	0	0	0	0	40	0	0		107	118	1	0
31	3	30	C2	570.833	304.167	875	0.347619	523.333	304.167	827.5	0.367573	13:25:00	both RFP and GFP	2	94	92	73	40	215.833	64750	2	147	135	130	40	343.333	103000		227	203	0.359606	0.640394
32	3	30	C3	570.833	304.167	875	0.347619	523.333	304.167	827.5	0.367573	13:32:00	GFP only + 1 RFP crypt, early colonization	2	22	32	20	40	61.6667	18500	0	0	0	0	40	0	0		32	20	1	0
33	3	30	C4	570.833	304.167	875	0.347619	523.333	304.167	827.5	0.367573	13:40:00	mostly RFP, little GFP	0	0	0	0	40	0	0	3	45	36	64	40	1208.33	362500		36	64	0	1
34	3	30	C5	570.833	304.167	875	0.347619	523.333	304.167	827.5	0.367573	13:47:00	both RFP and GFP	3	69	65	55	40	1575	472500	3	17	34	28	40	658.333	197500		99	83	0.662651	0.337349
35	3	30	D1	570.833	304.167	875	0.347619	523.333	304.167	827.5	0.367573	12:23:00	mostly GFP + 1 RFP crypt	0	103	112	112	40	2.725	817.5	0	134	160	133	40	3.55833	1067.5		272	245	0.457143	0.542857
36	3	30	D2	570.833	304.167	875	0.347619	523.333	304.167	827.5	0.367573	12:31:00	RFP only, early colonization	0	0	0	0	40	0	0	3	42	53	34	40	1075	322500		53	34	0	1
37	3	30	D3	570.833	304.167	875	0.347619	523.333	304.167	827.5	0.367573	12:39:00	RFP only, early colonization	3	28	13	23	40	533.333	160000	3	68	60	61	40	1575	472500		73	84	0.27381	0.72619
38	3	30	D4	570.833	304.167	875	0.347619	523.333	304.167	827.5	0.367573	12:48:00	both RFP and GFP	2	18	11	12	40	34.1667	10250	2	102	60	72	40	195	58500		71	84	0.142857	0.857143
39	3	30	D5	570.833	304.167	875	0.347619	523.333	304.167	827.5	0.367573	12:55:00	mostly GFP, some RFP	0	0	0	0	40	0	0	3	27	23	29	40	658.333	197500		23	29	0	1
40	3	30	D6	570.833	304.167	875	0.347619	523.333	304.167	827.5	0.367573	13:03:00	GFP only, early colonization	2	81	85	86	40	210	63000	0	0	0	0	40	0	0		85	86	1	0
41	2	31	A1	97.5	37.9167	135.417	0.28	111.667	36.5	148.167	0.246344	03:44:00	GFP only	1	176	170	161	40	42.25	12675	0	0	0	0	40	0	0		42.25	12675	1	0
42	2	31	A2	97.5	37.9167	135.417	0.28	111.667	36.5	148.167	0.246344	03:52:00	RFP only	0	0	0	0	40	0	0	1	83	81	91	40	21.25	6375		21.25	6375	0	1
43	2	31	A4	97.5	37.9167	135.417	0.28	111.667	36.5	148.167	0.246344	03:58:00	RFP only	0	0	0	0	40	0	0	3	95	86	73	40	2116.67	635000		2116.67	635000	0	1
44	2	31	A5	97.5	37.9167	135.417	0.28	111.667	36.5	148.167	0.246344	04:02:00	aposymbiotic	0	0	0	0	40	0	0	0	0	0	0	40	0	0		0	0	#DIV/0!	#DIV/0!
45	2	31	A6	97.5	37.9167	135.417	0.28	111.667	36.5	148.167	0.246344	04:08:00	aposymbiotic	0	0	0	0	40	0	0	0	0	0	0	40	0	0		0	0	#DIV/0!	#DIV/0!
46	2	31	B1	97.5	37.9167	135.417	0.28	111.667	36.5	148.167	0.246344	04:19:00	RFP only (plus GFP?)	2	42	56	58	40	130	39000	4	24	34	32	40	7500	2250000		7630	2289000	0.017038	0.982962
47	2	31	B2	97.5	37.9167	135.417	0.28	111.667	36.5	148.167	0.246344	04:24:00	aposymbiotic	0	0	0	0	40	0	0	0	0	0	0	40	0	0		0	0	#DIV/0!	#DIV/0!
48	2	31	B5	97.5	37.9167	135.417	0.28	111.667	36.5	148.167	0.246344	04:33:00	GFP only	4	45	43	52	40	11666.7	3500000	0	0	0	0	40	0	0		11666.7	3500000	1	0
49	2	31	B6	97.5	37.9167	135.417	0.28	111.667	36.5	148.167	0.246344	04:48:00	GFP only	0	13	15	15	40	0.358333	107.5	0	0	0	0	40	0	0		0.358333	107.5	1	0
50	2	31	C1	97.5	37.9167	135.417	0.28	111.667	36.5	148.167	0.246344	04:55:00	mostly RFP, 15 GFP crypts	2	3	2	1	40	5	1500	3	177	142	165	40	4033.33	1210000		4038.33	1211500	0.00123813	0.998762
51	2	31	C2	97.5	37.9167	135.417	0.28	111.667	36.5	148.167	0.246344	05:00:00	aposymbiotic	0	0	0	0	40	0	0	0	0	0	0	40	0	0		0	0	#DIV/0!	#DIV/0!
52	2	31	C3	97.5	37.9167	135.417	0.28	111.667	36.5	148.167	0.246344	05:06:00	GFP only	3	63	114	93	40	2250	675000	0	0	0	0	40	0	0		2250	675000	1	0
53	2	31	C4	97.5	37.9167	135.417	0.28	111.667	36.5	148.167	0.246344	05:14:00	mostly RFP, 15 GFP crypts	2	8	15	13	40	30	9000	3	95	105	96	40	2466.67	740000		2496.67	749000	0.012016	0.987984
54	2	31	C5	97.5	37.9167	135.417	0.28	111.667	36.5	148.167	0.246344	05:21:00	almost entirely RFP, 1 GFP crypt	3	26	35	32	40	775	232500	3	124	106	131	40	3008.33	902500		3783.33	1135000	0.204846	0.795154
55	2	31	C6	97.5	37.9167	135.417	0.28	111.667	36.5	148.167	0.246344	05:29:00	RFP plus GFP	2	54	69	66	40	157.5	47250	2	27	21	25	40	60.8333	18250		218.333	65500	0.721374	0.278626
56	2	31	D1	97.5	37.9167	135.417	0.28	111.667	36.5	148.167	0.246344	05:44:00	RFP only	0	0	0	0	40	0	0	4	19	24	24	40	5583.33	1675000		5583.33	1675000	0	1
57	2	31	D2	97.5	37.9167	135.417	0.28	111.667	36.5	148.167	0.246344	05:51:00	RFP only	0	0	0	0	40	0	0	2	107	150	173	40	358.333	107500		358.333	107500	0	1
58	2	31	D3	97.5	37.9167	135.417	0.28	111.667	36.5	148.167	0.246344	05:57:00	GFP only	1	269	146	211	40	52.1667	15650	0	0	0	0	40	0	0		52.1667	15650	1	0
59	2	31	D4	97.5	37.9167	135.417	0.28	111.667	36.5	148.167	0.246344	06:06:00	almost entirely RFP, 1 GFP crypt	0	0	0	0	40	0	0	3	14	27	26	40	558.333	167500		558.333	167500	0	1
60	2	31	D5	97.5	37.9167	135.417	0.28	111.667	36.5	148.167	0.246344	06:15:00	RFP only	0	0	0	0	40	0	0	3	35	39	37	40	925	277500		925	277500	0	1
61	2	31	D6	97.5	37.9167	135.417	0.28	111.667	36.5	148.167	0.246344	06:23:00	GFP only	3	105	92	94	40	2425	727500	0	0	0	0	40	0	0		2425	727500	1	0
62	1	31	A1	9	3.975	12.975	0.306358	10.1667	3.1	13.2667	0.233668	11:43:00	aposymbiotic	0	1	1	2	40	0.0333333	10	0	0	0	0	40	0	0		0.0333333	10	1	0
63	1	31	A2	9	3.975	12.975	0.306358	10.1667	3.1	13.2667	0.233668	11:48:00	GFP only	0	333	334	272	40	7.825	2347.5	0	0	0	0	40	0	0		7.825	2347.5	1	0
64	1	31	A3	9	3.975	12.975	0.306358	10.1667	3.1	13.2667	0.233668	11:54:00	GFP only	1	68	83	91	40	20.1667	6050	0	0	0	0	40	0	0		20.1667	6050	1	0
65	1	31	A4	9	3.975	12.975	0.306358	10.1667	3.1	13.2667	0.233668	12:12:00	GFP only	0	3	3	10	40	0.133333	40	0	0	0	0	40	0	0		0.133333	40	1	0
66	1	31	A5	9	3.975	12.975	0.306358	10.1667	3.1	13.2667	0.233668	12:16:00	RFP only	0	0	0	0	40	0	0	0	76	102	88	40	2.21667	665		2.21667	665	0	1
67	1	31	A6	9	3.975	12.975	0.306358	10.1667	3.1	13.2667	0.233668	12:21:00	almost entirely RFP, 1 GFP crypt	0	0	0	0	40	0	0	0	270	271	292	40	6.94167	2082.5		6.94167	2082.5	0	1
68	1	31	B1c	9	3.975	12.975	0.306358	10.1667	3.1	13.2667	0.233668	12:29:00	GFP only	2	158	174	200	40	443.333	133000	0	0	0	0	40	0	0		443.333	133000	1	0
69	1	31	B2	9	3.975	12.975	0.306358	10.1667	3.1	13.2667	0.233668	12:34:00	GFP only	1	283	219	195	40	58.0833	17425	0	0	0	0	40	0	0		58.0833	17425	1	0
70	1	31	B3	9	3.975	12.975	0.306358	10.1667	3.1	13.2667	0.233668	12:39:00	aposymbiotic	0	0	0	0	40	0	0	0	0	0	0	40	0	0		0	0	#DIV/0!	#DIV/0!
71	1	31	B4	9	3.975	12.975	0.306358	10.1667	3.1	13.2667	0.233668	12:44:00	RFP only	0	0	0	0	40	0	0	3	37	32	34	40	858.333	257500		858.333	257500	0	1
72	1	31	B5	9	3.975	12.975	0.306358	10.1667	3.1	13.2667	0.233668	12:50:00	RFP only	0	0	0	0	40	0	0	1	101	96	89	40	23.8333	7150		23.8333	7150	0	1
73	1	31	B6	9	3.975	12.975	0.306358	10.1667	3.1	13.2667	0.233668	12:53:00	aposymbiotic	0	0	0	0	40	0	0	0	0	0	0	40	0	0		0	0	#DIV/0!	#DIV/0!
74	1	31	C1	9	3.975	12.975	0.306358	10.1667	3.1	13.2667	0.233668	17:45:00	RFP only	0	0	0	0	40	0	0	1	94	109	112	40	26.25	7875		26.25	7875	0	1
75	1	31	C2	9	3.975	12.975	0.306358	10.1667	3.1	13.2667	0.233668	17:50:00	RFP only	0	0	0	0	40	0	0	1	22	20	17	40	4.91667	1475		4.91667	1475	0	1
76	1	31	C3	9	3.975	12.975	0.306358	10.1667	3.1	13.2667	0.233668	17:56:00	aposymbiotic/early NF colonization	0	0	0	0	40	0	0	0	0	0	0	40	0	0		0	0	#DIV/0!	#DIV/0!
77	1	31	C4	9	3.975	12.975	0.306358	10.1667	3.1	13.2667	0.233668	18:02:00	GFP only	0	277	172	224	40	5.60833	1682.5	0	0	0	0	40	0	0		5.60833	1682.5	1	0
78	1	31	C5	9	3.975	12.975	0.306358	10.1667	3.1	13.2667	0.233668	18:10:00	RFP only	0	0	0	0	40	0	0	1	27	21	22	40	5.83333	1750		5.83333	1750	0	1
79	1	31	C6	9	3.975	12.975	0.306358	10.1667	3.1	13.2667	0.233668	18:16:00	colonized with nonfluorescent bacteria	0	0	0	0	40	0	0	0	0	0	0	40	0	0		0	0	#DIV/0!	#DIV/0!
80	1	31	D1	9	3.975	12.975	0.306358	10.1667	3.1	13.2667	0.233668	18:21:00	RFP only	0	0	0	0	40	0	0	1	43	39	45	40	10.5833	3175		10.5833	3175	0	1
81	1	31	D2	9	3.975	12.975	0.306358	10.1667	3.1	13.2667	0.233668	18:24:00	aposymbiotic	0	0	0	0	40	0	0	0	0	0	0	40	0	0		0	0	#DIV/0!	#DIV/0!
82	1	31	D3	9	3.975	12.975	0.306358	10.1667	3.1	13.2667	0.233668	18:31:00	GFP only	1	86	77	60	40	18.5833	5575	0	0	0	0	40	0	0		18.5833	5575	1	0
83	1	31	D4	9	3.975	12.975	0.306358	10.1667	3.1	13.2667	0.233668	18:35:00	aposymbiotic	0	0	0	0	40	0	0	0	0	0	0	40	0	0		0	0	#DIV/0!	#DIV/0!
84	1	31	D5	9	3.975	12.975	0.306358	10.1667	3.1	13.2667	0.233668	18:39:00	GFP only; popped M4b	2	206	217	236	40	549.167	164750	0	0	0	0	40	0	0		549.167	164750	1	0
85	1	31	D6	9	3.975	12.975	0.306358	10.1667	3.1	13.2667	0.233668	18:45:00	RFP only	1	26	32	42	40	8.33333	2500	2	111	100	88	40	249.167	74750		257.5	77250	0.0323625	0.967638
