# Supplementary material for: Ecological drift during colonization drives within-host and between-host heterogeneity in an animal-associated symbiont
Source: PLoS Biol. 2024 Apr 25;22(4):e3002304. doi: 10.1371/journal.pbio.3002304 (PMC11075893; doi:10.1371/journal.pbio.3002304)
Supplement: S4 Table — Bimodality coefficients, population variances, species-level Fst, and dip statistics calculated from competition trials between GA-OX1 GFP and SQ4a RFP. (XLSX) [file pbio.3002304.s010.xlsx]

## Sheet: SQ4a_dTomato_table
S4 Table. Bimodality coefficients, population variances, species-level Fst, and dip statistics calculated from competition trials between GA-OX1 GFP and SQ4a RFP.
Inoculum Density	Sample Size	Bimodality Coefficient	Variance	Fst (GA-OX1 sfGFP)	Dip_Statistic
10^1 - 10^2	18	0.779999	0.194991	0.936427	0.137122
10^2 - 10^3	11	0.499907	0.167293	0.68056	0.139065
10^3 - 10^4	9	0.513311	0.182677	0.774873	0.138042
10^4 - 10^5	14	0.567756	0.135916	0.596704	0.093126
