# Supplementary material for: Ecological drift during colonization drives within-host and between-host heterogeneity in an animal-associated symbiont
Source: PLoS Biol. 2024 Apr 25;22(4):e3002304. doi: 10.1371/journal.pbio.3002304 (PMC11075893; doi:10.1371/journal.pbio.3002304)
Supplement: S5 Code — (R) [file pbio.3002304.s022.R]

library(readxl)  #version 1.3.1
library(ggplot2) #version 3.4.2
library(scales)  #version 1.2.1; for percentage values in axes
library(cowplot) #version 1.1.1
library(grafify) #version 4.0.1

##################################################################################################################################
#Define a function to determine the ratio of RFP intensity to GFP intensity within a sliding window along the M4:

distance_by_intensity <- function(file_pathname) {
  mydata<-read.csv(file_pathname)
  #mydata<-read_excel(file_pathname)                                       #You can choose to read in the excel file if desired.
  #head(mydata)
  M4_length=mydata$Axis_.mm.                                               #read in the length values along the region of interest (ROI).
  percent_lengths=M4_length/M4_length[length(M4_length)]                   #convert these lengths into relative values.
  GFP=mydata$GFP_intensity_normalized                                      #read in GFP intensity values along the length of the ROI
  RFP=mydata$RFP_intensity_normalized                                      #read in RFP intensity values along the length of the ROI
  RFPGFP_ratio=RFP/GFP                                                     #take the ratio of RFP intensity to GFP intensity along the length of the ROI
  ratios_normalized=log10(RFPGFP_ratio)                                    #normalize these ratios with a log transformation.
  
  inoculumsize=c()
  stage=c()
  Nymph=c()
  for (i in 1:length(percent_lengths)) {
    inoculumsize<-append(inoculumsize, inoc_density)
    stage<-append(stage, instar)
    Nymph<-append(Nymph, name)
  }
  
  data.frame(percent_lengths, ratios_normalized, inoculumsize, stage, Nymph)          #make a dataframe to store these values
  
}

##################################################################################################################################
#Define a function to calculate the variance in the above value within each sliding window:

RFPvariance_sliding_window <- function(file_pathname) {
  mydata<-read.csv(file_pathname)
  #mydata<-read_excel(file_pathname)                                       #You can choose to read in the excel file if desired.
  names(mydata)[1] <- "Axis_[m]"                                           #The .csv and .excel files are the same, but when read into a dataframe they give different column names. This standardizes the column names regardless of what file type you choose to use.
  #head(mydata)
  FP=mydata$RFP_intensity_normalized/mydata$GFP_intensity_normalized                                       #read in RFP intensity values; RFP is better.
  interval=round(0.1*length(FP), digits=0)                                 #define the size of a window for analysis
  intensity_variances=c()                                                  #start an empty vector for holding variance in intensity within each window
  percent_lengths=c()
  inoculumsize=c()
  stage=c()
  Nymph=c()
  for (i in 1:length(FP)) {                                                #For each position along the symbiotic organ associated with a fluorescence intensity value...
    end_position=i+interval-1                                              #...first define the end of the window.
    if (end_position > length(FP)) {break}                                 #If the end of the window is outside the entire length of the M4, that means our analysis is over.
    else {
      #print(c(i, end_position))                                           #Otherwise...
      variance=var(log(FP[i:end_position]))                                #calculate the variance in fluorescence intensity within the window...
      intensity_variances<-append(intensity_variances, variance)           #and append that value to our growing list of variances.
      lth=mydata$`Axis_[m]`[i]/mydata$`Axis_[m]`[length(mydata$`Axis_[m]`)]
      percent_lengths<-append(percent_lengths, lth)                        #Read in relative length along the M4
      
      inoculumsize<-append(inoculumsize, inoc_density)
      stage<-append(stage, instar)
      Nymph<-append(Nymph, name)
      
    }   
  }
  
  data.frame(percent_lengths, intensity_variances, inoculumsize, stage, Nymph)
  #ggplot(data.frame(percent_lengths, intensity_variances), aes(x=percent_lengths,y=intensity_variances))+
  #geom_line(size=1.5, color="#FF00FF")+
  #scale_x_continuous(limits = c(0,1), labels=percent)+
  #scale_y_continuous(labels=comma)+
  #labs(x="% M4 length", y="Variance in RFP Intensity")+
  #theme_classic(base_size=20)+
  #theme(axis.text.x = element_text(hjust=0.5), legend.position = "none")
  
}

##################################################################################################################################
#Color palettes: Examine these and other color palettes from grafify and how to use them below:

library(grafify)
#plot_grafify_palette(palette = "fishy")
#plot_grafify_palette(palette = "kelly")
#plot_grafify_palette(palette = "vibrant")
#plot_grafify_palette(palette = "okabe_ito")
#plot_grafify_palette(palette = "bright")
#plot_grafify_palette(palette = "muted")

#See https://grafify-vignettes.netlify.app/colour_palettes.html#colours-in-grafify for all the color palettes.

#Or use the manually defined colorblind palette based on the grafify palette "kelly":
cbPalette <- c("#875692",
               "#F6A600",
               "#C2B280",
               "#848482",
               "#008856",
               "#0067A5",
               "#F99379",
               "#604E97",
               "#654522",
               "#B3446C",
               "#DCD300",
               "#A1CAF1",
               "#882D17",
               "Sea Green 3",
               "#E25822",
               "#F3C300",
               "#BE0032",
               "#F38400",
               "#E68FAC",
               "#2B3D26"
)

##################################################################################################################################
#Visualizing Dil4 Nymph RFP/GFP intensity ratios along the length of the M4:
inoc_density="1e2 CFUs/µL"   #Calculated inoculum density is 63 CFUs/µL
instar=2

  #RFP- and GFP-only controls:
  name="GFP_dil4"
  GFP_dil4_ratios<-distance_by_intensity("Dil4-GFPctrl-10X-withautofocus_Merged/Chart_01.csv")
  name="RFP_dil4"
  RFP_dil4_ratios<-distance_by_intensity("Dil4-RFPctrl3-10X-withautofocus_Merged/Chart_01_RFPonly.csv")
  
  #Co-colonized samples (3 total):
  name="mix1_dil4"
  mix1_dil4_ratios<-distance_by_intensity("Dil4-Mix1-10X-withautofocus_Merged/Chart_01_mix1.csv")
  name="mix2_dil4"
  mix2_dil4_ratios<-distance_by_intensity("Dil4-Mix2-10X-withautofocus_Merging_001/Chart_01_mix2.csv")
  name="mix3_dil4"
  mix3_dil4_ratios<-distance_by_intensity("Dil4-Mix3-10X-withautofocus_Merged/Chart_01_mix3.csv")

#Visualizing Dil0 Nymph RFP/GFP intensity ratios along the length of the M4:
inoc_density="1e6 CFUs/µL"  #Calculated inoculum density is 931666 CFUs/µL
instar=2

  #RFP- and GFP-only Controls:
  name="GFP_dil0"
  GFP_dil0_ratios<-distance_by_intensity("Dil0-L2-GFPctrl-10X-withautofocus_Merged/Chart_01_GFPonly.csv")
  name="RFP_dil0"
  RFP_dil0_ratios<-distance_by_intensity("Dil0-L2-RFPctrl4-10X-withautofocus_Merged/Chart_01_RFPonly.csv")
  
  #Co-colonized samples (4 total):
  name="mix1_dil0"
  mix1_dil0_ratios<-distance_by_intensity("Dil0-L2-mix1-10X-withautofocus_Merged/Chart_01_mix1.csv")
  name="mix2_dil0"
  mix2_dil0_ratios<-distance_by_intensity("Dil0-L2-mix2-10X-withautofocus_Merged/Chart_01_mix2.csv")
  name="mix3_dil0"
  mix3_dil0_ratios<-distance_by_intensity("Dil0-L2-mix3-10X-withautofocus_Merged/Chart_01_mix3.csv")
  name="mix4_dil0"
  mix4_dil0_ratios<-distance_by_intensity("Dil0-L2-mix4-10X-withautofocus_Merged/Chart_01_mix4.csv")

#Gather this data in one place:
Dil0v4_L2ratios<-rbind(#GFP_dil0_ratios, GFP_dil4_ratios,
  mix1_dil0_ratios, mix2_dil0_ratios, mix3_dil0_ratios, mix4_dil0_ratios, 
  mix1_dil4_ratios, mix2_dil4_ratios, mix3_dil4_ratios#, RFP_dil0_ratios, RFP_dil4_ratios
)
#head(Dil0v4_L2ratios)

##################################################################################################################################
#Visualizing Dil4 Nymph RFP variances along the length of the M4:
inoc_density="1e2 CFUs/µL" #Calculated inoculum density is 63 CFUs/µL
instar=2
  
  #RFP- and GFP-only controls:
  name="GFP_dil4"
  dil4_L2_GFP_RFPvariances<-RFPvariance_sliding_window("Dil4-GFPctrl-10X-withautofocus_Merged/Chart_01.csv")
  name="RFP_dil4"
  dil4_L2_RFP_RFPvariances<-RFPvariance_sliding_window("Dil4-RFPctrl3-10X-withautofocus_Merged/Chart_01_RFPonly.csv")
  
  #Co-colonized samples (3 total):
  name="mix1_dil4"
  dil4_L2_mix1_RFPvariances<-RFPvariance_sliding_window("Dil4-Mix1-10X-withautofocus_Merged/Chart_01_mix1.csv")
  name="mix2_dil4"
  dil4_L2_mix2_RFPvariances<-RFPvariance_sliding_window("Dil4-Mix2-10X-withautofocus_Merging_001/Chart_01_mix2.csv")
  name="mix3_dil4"
  dil4_L2_mix3_RFPvariances<-RFPvariance_sliding_window("Dil4-Mix3-10X-withautofocus_Merged/Chart_01_mix3.csv")

#Visualizing Dil0 Nymph RFP variances along the length of the M4:
inoc_density="1e6 CFUs/µL"  #Calculated inoculum density is 931666 CFUs/µL
instar=2

  #RFP- and GFP-only Controls:
  name="GFP_dil0"
  dil0_L2_GFP_RFPvariances<-RFPvariance_sliding_window("Dil0-L2-GFPctrl-10X-withautofocus_Merged/Chart_01_GFPonly.csv")
  name="RFP_dil0"
  dil0_L2_RFP_RFPvariances<-RFPvariance_sliding_window("Dil0-L2-RFPctrl4-10X-withautofocus_Merged/Chart_01_RFPonly.csv")
  
  #Co-colonized samples (4 total):
  name="mix1_dil0"
  dil0_L2_mix1_RFPvariances<-RFPvariance_sliding_window("Dil0-L2-mix1-10X-withautofocus_Merged/Chart_01_mix1.csv")
  name="mix2_dil0"
  dil0_L2_mix2_RFPvariances<-RFPvariance_sliding_window("Dil0-L2-mix2-10X-withautofocus_Merged/Chart_01_mix2.csv")
  name="mix3_dil0"
  dil0_L2_mix3_RFPvariances<-RFPvariance_sliding_window("Dil0-L2-mix3-10X-withautofocus_Merged/Chart_01_mix3.csv")
  name="mix4_dil0"
  dil0_L2_mix4_RFPvariances<-RFPvariance_sliding_window("Dil0-L2-mix4-10X-withautofocus_Merged/Chart_01_mix4.csv")

#Gather this data in one place:
Dil0v4_L2vars<-rbind(#dil0_L2_GFP_RFPvariances, dil4_L2_GFP_RFPvariances, 
  dil0_L2_mix1_RFPvariances, dil0_L2_mix2_RFPvariances, dil0_L2_mix3_RFPvariances, dil0_L2_mix4_RFPvariances,
  dil4_L2_mix1_RFPvariances, dil4_L2_mix2_RFPvariances, dil4_L2_mix3_RFPvariances#, dil0_L2_RFP_RFPvariances, dil4_L2_RFP_RFPvariances
  )
#head(Dil0v4_L2vars)

##################################################################################################################################
#Plotting the intensity ratio data:
plotL2ratio <- ggplot(Dil0v4_L2ratios, aes(x=percent_lengths, y=ratios_normalized, colour=Nymph))+
  geom_line(size=1)+
  scale_x_continuous(breaks= c(0,1), labels = c("Anterior","Posterior"))+
  theme_classic(base_size=25)+
  labs(x="Progession along the M4", y="log(RFP/GFP)")+
  theme(axis.ticks.x = element_blank(), axis.title.x=element_blank(), legend.position = "none")+
  scale_colour_grafify("fishy", rev=TRUE)+
  #scale_color_manual(values=cbPalette)+
  theme(legend.position="NONE",
        axis.ticks.x = element_blank(),
        axis.text.x = element_blank()
  )+
  facet_grid(inoculumsize~.)
plotL2ratio
#ggsave("Fig4C-RFPGFP-ratio.tiff", width=6, height=10)

#Plotting the variance data:
plotL2vars <- ggplot(Dil0v4_L2vars, aes(x=percent_lengths, y=intensity_variances, colour=Nymph))+
  geom_line(size=1)+
  scale_x_continuous(breaks=c(0,0.94), labels=c("Anterior", "Posterior"))+
  theme_classic(base_size=25)+
  labs(x="Progression along the M4",  y="var(log(RFP/GFP))")+
  scale_colour_grafify("fishy", rev=TRUE)+
  #scale_color_manual(values=cbPalette)+
  theme(axis.ticks.x = element_blank(), axis.title.x=element_blank(), legend.position = "none")+
  facet_grid(inoculumsize~.)
plotL2vars
#ggsave("Fig4C-M4_length_vs._var.tiff", width=6, height=10)

#Putting the plots together:
p1<-plot_grid(plotL2ratio, plotL2vars)
ggdraw(add_sub(plot=p1, "Crypt location along the M4", size=25, vjust = 0.25))
ggsave2("Figure_4C.tiff", width=9, height=10)
