# Supplementary material for: Ecological drift during colonization drives within-host and between-host heterogeneity in an animal-associated symbiont
Source: PLoS Biol. 2024 Apr 25;22(4):e3002304. doi: 10.1371/journal.pbio.3002304 (PMC11075893; doi:10.1371/journal.pbio.3002304)
Supplement: S5 Data — Colony count data of SQ4a sfGFP and GA-OX1 RFP colonization trials from each insect, including insects from which no fluorescent colonies were recovered. (XLSX) [file pbio.3002304.s015.xlsx]

## Sheet: Sheet1
Index	Dilution_Category	Trial	L2_ID	sfGFP_Inoculum_before	dTomato_Inoculum_before	Inoculum_Density_Before	percent_dTomato_before	sfGFP_Inoculum_after	dTomato_Inoculum_after	Inoculum_Density_After	percent_dTomato_after	Time	Crypt_phenotype	Dilution_Level	GFP_CFU_1	GFP_CFU_2	GFP_CFU_3	Spot_Volume_(uL)	GFP_CFU/uL	Total_GFP_CFU/sample	Dilution_Level	dTomato_CFU_1	dTomato_CFU_2	dTomato_CFU_3	Spot_Volume_(uL)	dTomato_CFU/uL	Total_dTomato_CFU/sample		Average_CFU/uL	Total_CFU/sample	percent_GFP_CFUs	percent_RFP_CFUs
1	4—5	19	A5	18333.3	7333.33	25666.7	0.285714	25750	28583.3	54333.3	0.526074	1900-01-01	GFP only	2	49	47	52	40	123.333	37000	1	0	0	0	40	0	0		123.333	37000	1	0
2	4—5	19	B2	18333.3	7333.33	25666.7	0.285714	25750	28583.3	54333.3	0.526074	1900-01-01	RFP only	1	0	0	0	40	0	0	2	117	98	106	40	267.5	80250		267.5	80250	0	1
3	4—5	19	B4	18333.3	7333.33	25666.7	0.285714	25750	28583.3	54333.3	0.526074	1900-01-01	mostly RFP, a few GFP crypts anteriorly. This was imaged	0	0	0	0	40	0	0	1	118	118	123	40	29.9167	8975		29.9167	8975	0	1
4	4—5	19	C3	18333.3	7333.33	25666.7	0.285714	25750	28583.3	54333.3	0.526074	1900-01-01	RFP only	1	0	0	0	40	0	0	2	103	108	119	40	275	82500		275	82500	0	1
5	4—5	19	C6	18333.3	7333.33	25666.7	0.285714	25750	28583.3	54333.3	0.526074	1900-01-01	RFP only	1	0	0	0	40	0	0	1	220	248	242	40	59.1667	17750		59.1667	17750	0	1
6	4—5	19	D1	18333.3	7333.33	25666.7	0.285714	25750	28583.3	54333.3	0.526074	1900-01-01	RFP only	1	0	0	0	40	0	0	2	37	43	32	40	93.3333	28000		93.3333	28000	0	1
7	4—5	19	D2	18333.3	7333.33	25666.7	0.285714	25750	28583.3	54333.3	0.526074	1900-01-01	RFP only	1	0	0	0	40	0	0	3	148	121	120	40	3241.67	972500		3241.67	972500	0	1
8	0—1	27	D1	2.85	1.63333	4.48333	0.364312	3.13333	1.55	4.68333	0.330961	15:19:00	GFP only	1	77	69	101	40	20.5833	6175	0	0	0	0	40	0	0		20.5833	6175	1	0
9	0—1	27	D6	2.85	1.63333	4.48333	0.364312	3.13333	1.55	4.68333	0.330961	15:48:00	GFP only	2	37	23	34	40	78.3333	23500	0	0	0	0	40	0	0		78.3333	23500	1	0
10	1—2	28	A1	37	15.75	52.75	0.298578	41.75	15.0833	56.8333	0.265396	11:38:00	GFP only	3	37	31	48	40	966.667	290000	0	0	0	0	40	0	0		966.667	290000	1	0
11	1—2	28	A2	37	15.75	52.75	0.298578	41.75	15.0833	56.8333	0.265396	12:10:00	GFP only	3	18	27	25	40	583.333	175000	0	0	0	0	40	0	0		583.333	175000	1	0
12	1—2	28	A3	37	15.75	52.75	0.298578	41.75	15.0833	56.8333	0.265396	12:24:00	GFP only	4	23	25	27	40	6250	1875000	0	0	0	0	40	0	0		6250	1875000	1	0
13	1—2	28	A4	37	15.75	52.75	0.298578	41.75	15.0833	56.8333	0.265396	12:38:00	almost entirely RFP; 4 GFP crypts	1	39	46	43	40	10.6667	3200	4	26	23	25	40	6166.67	1850000		6177.33	1853200	1	0
14	1—2	28	A5	37	15.75	52.75	0.298578	41.75	15.0833	56.8333	0.265396	12:53:00	GFP only	3	45	52	65	40	1350	405000	0	0	0	0	40	0	0		1350	405000	1	0
15	1—2	28	B1	37	15.75	52.75	0.298578	41.75	15.0833	56.8333	0.265396	13:14:00	GFP only	3	83	94	105	40	2350	705000	0	0	0	0	40	0	0		2350	705000	1	0
16	1—2	28	B2	37	15.75	52.75	0.298578	41.75	15.0833	56.8333	0.265396	13:31:00	GFP only	4	65	76	68	40	17416.7	5225000	0	0	0	0	40	0	0		17416.7	5225000	1	0
17	1—2	28	B3	37	15.75	52.75	0.298578	41.75	15.0833	56.8333	0.265396	13:46:00	GFP only	4	33	24	33	40	7500	2250000	0	0	0	0	40	0	0		7500	2250000	1	0
18	1—2	28	B5	37	15.75	52.75	0.298578	41.75	15.0833	56.8333	0.265396	14:07:00	aposymbiotic	contaminated	contaminated	contaminated	contaminated	40	#DIV/0!	#DIV/0!	contaminated	contaminated	contaminated	contaminated	40	#DIV/0!	#DIV/0!		#DIV/0!	#DIV/0!	1	0
19	1—2	28	B6	37	15.75	52.75	0.298578	41.75	15.0833	56.8333	0.265396	14:24:00	GFP only; early colonization	2	200	179	161	40	450	135000	0	0	0	0	40	0	0		450	135000	1	0
20	1—2	28	C1	37	15.75	52.75	0.298578	41.75	15.0833	56.8333	0.265396	14:55:00	GFP only	3	42	36	36	40	950	285000	0	0	0	0	40	0	0		950	285000	1	0
21	1—2	28	C2	37	15.75	52.75	0.298578	41.75	15.0833	56.8333	0.265396	16:22:00	GFP only	1	60	40	42	40	11.8333	3550	0	0	0	0	40	0	0		11.8333	3550	1	0
22	1—2	28	C3	37	15.75	52.75	0.298578	41.75	15.0833	56.8333	0.265396	16:38:00	GFP only	3	31	29	25	40	708.333	212500	0	0	0	0	40	0	0		708.333	212500	1	0
23	1—2	28	C4	37	15.75	52.75	0.298578	41.75	15.0833	56.8333	0.265396	16:55:00	GFP only	3	51	57	46	40	1283.33	385000	0	0	0	0	40	0	0		1283.33	385000	1	0
24	1—2	28	C5	37	15.75	52.75	0.298578	41.75	15.0833	56.8333	0.265396	17:11:00	GFP only	0	138	127	127	40	3.26667	980	0	0	0	0	40	0	0		3.26667	980	1	0
25	1—2	28	C6	37	15.75	52.75	0.298578	41.75	15.0833	56.8333	0.265396	17:36:00	almost entirely RFP; 5 GFP crypts	0	12	19	17	40	0.4	120	2	38	33	44	40	95.8333	28750		96.2333	28870	1	0
26	1—2	28	D1	37	15.75	52.75	0.298578	41.75	15.0833	56.8333	0.265396	17:48:00	GFP only	contaminated	contaminated	contaminated	contaminated	40	#DIV/0!	#DIV/0!	contaminated	contaminated	contaminated	contaminated	40	#DIV/0!	#DIV/0!		#DIV/0!	#DIV/0!	1	0
27	1—2	28	D3	37	15.75	52.75	0.298578	41.75	15.0833	56.8333	0.265396	17:58:00	GFP only	contaminated	contaminated	contaminated	contaminated	40	#DIV/0!	#DIV/0!	contaminated	contaminated	contaminated	contaminated	40	#DIV/0!	#DIV/0!		#DIV/0!	#DIV/0!	1	0
28	1—2	28	D5	37	15.75	52.75	0.298578	41.75	15.0833	56.8333	0.265396	18:15:00	GFP only	0	0	0	0	40	0	0	0	0	0	0	40	0	0		0	0	1	0
29	1—2	28	D6	37	15.75	52.75	0.298578	41.75	15.0833	56.8333	0.265396	18:27:00	aposymbiotic	contaminated	contaminated	contaminated	contaminated	40	#DIV/0!	#DIV/0!	contaminated	contaminated	contaminated	contaminated	40	#DIV/0!	#DIV/0!		#DIV/0!	#DIV/0!	1	0
30	2—3	28	A1	445.833	159.167	605	0.263085	410	147.5	557.5	0.264574	13:23:00	both GFP and RFP	3	118	110	120	40	2900	870000	2	54	44	64	40	135	40500		3035	910500	0.955519	0.0444811
31	2—3	28	A2	445.833	159.167	605	0.263085	410	147.5	557.5	0.264574	13:34:00	GFP only	2	176	186	184	40	455	136500	0	0	0	0	40	0	0		455	136500	1	0
32	2—3	28	A3	445.833	159.167	605	0.263085	410	147.5	557.5	0.264574	13:54:00	both GFP and RFP	2	44	40	38	40	101.667	30500	3	34	40	40	40	950	285000		1051.67	315500	0.0966719	0.903328
33	2—3	28	A4	445.833	159.167	605	0.263085	410	147.5	557.5	0.264574	15:13:00	RFP only	0	0	0	0	40	0	0	1	19	19	26	40	5.33333	1600		5.33333	1600	0	1
34	2—3	28	A5	445.833	159.167	605	0.263085	410	147.5	557.5	0.264574	15:27:00	RFP only; newly molted to L3	0	0	0	0	40	0	0	2	33	24	31	40	73.3333	22000		73.3333	22000	0	1
35	2—3	28	A6	445.833	159.167	605	0.263085	410	147.5	557.5	0.264574	15:42:00	GFP only	0	0	0	0	40	0	0	0	0	0	0	40	0	0		0	0	#DIV/0!	#DIV/0!
36	2—3	28	B1	445.833	159.167	605	0.263085	410	147.5	557.5	0.264574	15:58:00	GFP only	1	161	138	123	40	35.1667	10550	0	0	0	0	40	0	0		35.1667	10550	1	0
37	2—3	28	B2	445.833	159.167	605	0.263085	410	147.5	557.5	0.264574	16:09:00	GFP only	2	116	131	135	40	318.333	95500	0	0	0	0	40	0	0		318.333	95500	1	0
38	2—3	28	B3	445.833	159.167	605	0.263085	410	147.5	557.5	0.264574	17:38:00	GFP early colonization	1	58	57	48	40	13.5833	4075	0	18	16	19	40	0.441667	132.5		14.025	4207.5	0.968509	0.0314914
39	2—3	28	B4	445.833	159.167	605	0.263085	410	147.5	557.5	0.264574	17:49:00	GFP only	2	55	56	57	40	140	42000	0	0	0	0	40	0	0		140	42000	1	0
40	2—3	28	B5	445.833	159.167	605	0.263085	410	147.5	557.5	0.264574	18:03:00	GFP only	0	0	0	0	40	0	0	0	0	0	0	40	0	0		0	0	#DIV/0!	#DIV/0!
41	2—3	28	B6	445.833	159.167	605	0.263085	410	147.5	557.5	0.264574	18:16:00	GFP only	0	7	8	2	40	0.141667	42.5	0	0	0	0	40	0	0		0.141667	42.5	1	0
42	2—3	28	C3	445.833	159.167	605	0.263085	410	147.5	557.5	0.264574	18:33:00	mostly RFP; scattered GFP crypts	0	0	0	0	40	0	0	1	71	69	80	40	18.3333	5500		18.3333	5500	0	1
43	2—3	28	C4	445.833	159.167	605	0.263085	410	147.5	557.5	0.264574	18:48:00	RFP only	0	0	0	0	40	0	0	1	20	24	14	40	4.83333	1450		4.83333	1450	0	1
44	2—3	28	C5	445.833	159.167	605	0.263085	410	147.5	557.5	0.264574	18:57:00	mostly RFP; some GFP; early colonization	2	30	33	33	40	80	24000	4	47	46	50	40	11916.7	3575000		11996.7	3599000	0.00666852	0.993331
45	2—3	28	C6	445.833	159.167	605	0.263085	410	147.5	557.5	0.264574	19:09:00	GFP only	2	64	83	75	40	185	55500	0	0	0	0	40	0	0		185	55500	1	0
46	2—3	28	D1	445.833	159.167	605	0.263085	410	147.5	557.5	0.264574	20:59:00	GFP only	1	76	83	81	40	20	6000	0	0	0	0	40	0	0		20	6000	1	0
47	2—3	28	D2	445.833	159.167	605	0.263085	410	147.5	557.5	0.264574	21:09:00	RFP only	0	0	0	0	40	0	0	2	22	38	40	40	83.3333	25000		83.3333	25000	0	1
48	2—3	28	D3	445.833	159.167	605	0.263085	410	147.5	557.5	0.264574	21:21:00	GFP only	1	125	107	108	40	28.3333	8500	0	0	0	0	40	0	0		28.3333	8500	1	0
49	2—3	28	D4	445.833	159.167	605	0.263085	410	147.5	557.5	0.264574	21:35:00	mostly RFP; some GFP	0	14	21	11	40	0.383333	115	2	92	75	73	40	200	60000		200.383	60115	0.001913	0.998087
50	2—3	28	D5	445.833	159.167	605	0.263085	410	147.5	557.5	0.264574	21:50:00	GFP only	0	48	21	52	40	1.00833	302.5	0	0	0	0	40	0	0		1.00833	302.5	1	0
51	4—5	32	A1	14083.3	7333.33	21416.7	0.342412	13333.3	7250	20583.3	0.352227	12:11:00	mostly RFP	1	8	11	12	40	2.58333	775	3	24	25	20	40	575	172500		577.583	173275	0.00447266	0.995527
52	4—5	32	A2	14083.3	7333.33	21416.7	0.342412	13333.3	7250	20583.3	0.352227	12:17:00	RFP only	0	0	0	0	40	0	0	2	42	56	48	40	121.667	36500		121.667	36500	0	1
53	4—5	32	A3	14083.3	7333.33	21416.7	0.342412	13333.3	7250	20583.3	0.352227	12:24:00	almost only RFP, 1 GFP crypt	0	28	11	24	40	0.525	157.5	2	30	51	31	40	93.3333	28000		93.8583	28157.5	0.00559354	0.994406
54	4—5	32	A4	14083.3	7333.33	21416.7	0.342412	13333.3	7250	20583.3	0.352227	12:32:00	mostly RFP, some GFP	2	42	59	40	40	117.5	35250	3	101	101	114	40	2633.33	790000		2750.83	825250	0.0427143	0.957286
55	4—5	32	A5	14083.3	7333.33	21416.7	0.342412	13333.3	7250	20583.3	0.352227	12:42:00	GFP only	0	268	277	311	40	7.13333	2140	0	0	0	0	40	0	0		7.13333	2140	1	0
56	4—5	32	B1	14083.3	7333.33	21416.7	0.342412	13333.3	7250	20583.3	0.352227	12:49:00	GFP only. L3 nymph	3	105	120	115	40	2833.33	850000	0	0	0	0	40	0	0		2833.33	850000	1	0
57	4—5	32	B2	14083.3	7333.33	21416.7	0.342412	13333.3	7250	20583.3	0.352227	12:56:00	aposymbiotic	0	0	0	0	40	0	0	0	0	0	0	40	0	0		0	0	#DIV/0!	#DIV/0!
58	4—5	32	B3	14083.3	7333.33	21416.7	0.342412	13333.3	7250	20583.3	0.352227	13:05:00	RFP only	0	0	0	0	40	0	0	4	33	40	45	40	9833.33	2950000		9833.33	2950000	0	1
59	4—5	32	B4	14083.3	7333.33	21416.7	0.342412	13333.3	7250	20583.3	0.352227	15:53:00	mostly RFP, very little GFP	1	215	284	215	40	59.5	17850	2	77	60	61	40	165	49500		224.5	67350	0.265033	0.734967
60	4—5	32	B5	14083.3	7333.33	21416.7	0.342412	13333.3	7250	20583.3	0.352227	16:01:00	about 75% RFP, 25% GFP	0	225	255	351	40	6.925	2077.5	1	103	149	114	40	30.5	9150		37.425	11227.5	0.185037	0.814963
61	4—5	32	C1	14083.3	7333.33	21416.7	0.342412	13333.3	7250	20583.3	0.352227		died					40	#DIV/0!	#DIV/0!					40	#DIV/0!	#DIV/0!		#DIV/0!	#DIV/0!	#DIV/0!	#DIV/0!
62	4—5	32	C2	14083.3	7333.33	21416.7	0.342412	13333.3	7250	20583.3	0.352227	16:21:00	GFP only	0	0	0	0	40	0	0	0	0	0	0	40	0	0		0	0	#DIV/0!	#DIV/0!
63	4—5	32	C3	14083.3	7333.33	21416.7	0.342412	13333.3	7250	20583.3	0.352227	16:26:00	RFP only. L3 nymph	0	0	0	0	40	0	0	1	28	37	40	40	8.75	2625		8.75	2625	0	1
64	4—5	32	C4	14083.3	7333.33	21416.7	0.342412	13333.3	7250	20583.3	0.352227	16:34:00	50/50 RFP and GFP. L3 nymph	1	333	351	381	40	88.75	26625	2	108	96	104	40	256.667	77000		345.417	103625	0.256936	0.743064
65	4—5	32	C5	14083.3	7333.33	21416.7	0.342412	13333.3	7250	20583.3	0.352227	16:41:00	early colonization, 50/50 RFP and GFP	0	0	0	0	40	0	0	0	0	0	0	40	0	0		0	0	#DIV/0!	#DIV/0!
66	1—2	33	A1	23.1667	8.91667	32.0833	0.277922	25.5	8.5	34	0.25	04:40:00	RFP only	0	0	0	0	40	0	0	3	38	38	40	40	966.667	290000		966.667	290000	0	1
67	1—2	33	A2	23.1667	8.91667	32.0833	0.277922	25.5	8.5	34	0.25	04:54:00	GFP only	2	80	48	78	40	171.667	51500	0	0	0	0	40	0	0		171.667	51500	1	0
68	1—2	33	A3	23.1667	8.91667	32.0833	0.277922	25.5	8.5	34	0.25	05:09:00	GFP only	3	44	35	40	40	991.667	297500	0	0	0	0	40	0	0		991.667	297500	1	0
69	1—2	33	A4	23.1667	8.91667	32.0833	0.277922	25.5	8.5	34	0.25	05:14:00	aposymbiotic	0	0	0	0	40	0	0	0	0	0	0	40	0	0		0	0	#DIV/0!	#DIV/0!
70	1—2	33	A5	23.1667	8.91667	32.0833	0.277922	25.5	8.5	34	0.25	05:21:00	almost entirely RFP, 1 GFP crypt	0	42	38	43	40	1.025	307.5	2	128	131	130	40	324.167	97250		325.192	97557.5	0.00315199	0.996848
71	1—2	33	A6	23.1667	8.91667	32.0833	0.277922	25.5	8.5	34	0.25	05:30:00	GFP only	1	289	241	280	40	67.5	20250	0	0	0	0	40	0	0		67.5	20250	1	0
72	1—2	33	B1	23.1667	8.91667	32.0833	0.277922	25.5	8.5	34	0.25	05:41:00	mostly RFP, some GFP, about 80:20	0	70	75	76	40	1.84167	552.5	1	131	159	182	40	39.3333	11800		41.175	12352.5	0.0447278	0.955272
73	1—2	33	B2	23.1667	8.91667	32.0833	0.277922	25.5	8.5	34	0.25	05:51:00	GFP only	2	26	23	32	40	67.5	20250	0	0	0	0	40	0	0		67.5	20250	1	0
74	1—2	33	B3	23.1667	8.91667	32.0833	0.277922	25.5	8.5	34	0.25	05:57:00	aposymbiotic	0	0	0	0	40	0	0	0	0	0	0	40	0	0		0	0	#DIV/0!	#DIV/0!
75	1—2	33	B4	23.1667	8.91667	32.0833	0.277922	25.5	8.5	34	0.25	06:06:00	aposymbiotic	0	0	0	0	40	0	0	0	0	0	0	40	0	0		0	0	#DIV/0!	#DIV/0!
76	1—2	33	B5	23.1667	8.91667	32.0833	0.277922	25.5	8.5	34	0.25	06:12:00	aposymbiotic	0	0	0	0	40	0	0	0	0	0	0	40	0	0		0	0	#DIV/0!	#DIV/0!
77	1—2	33	B6	23.1667	8.91667	32.0833	0.277922	25.5	8.5	34	0.25	06:26:00	aposymbiotic	0	0	0	0	40	0	0	0	0	0	0	40	0	0		0	0	#DIV/0!	#DIV/0!
78	1—2	33	C1	23.1667	8.91667	32.0833	0.277922	25.5	8.5	34	0.25	06:34:00	aposymbiotic	0	0	0	0	40	0	0	0	0	0	0	40	0	0		0	0	#DIV/0!	#DIV/0!
79	1—2	33	C2	23.1667	8.91667	32.0833	0.277922	25.5	8.5	34	0.25	06:43:00	GFP only	2	100	122	101	40	269.167	80750	0	0	0	0	40	0	0		269.167	80750	1	0
80	1—2	33	C3	23.1667	8.91667	32.0833	0.277922	25.5	8.5	34	0.25	06:51:00	GFP only	1	123	142	166	40	35.9167	10775	0	0	0	0	40	0	0		35.9167	10775	1	0
81	1—2	33	C4	23.1667	8.91667	32.0833	0.277922	25.5	8.5	34	0.25	07:02:00	aposymbiotic	0	0	0	0	40	0	0	0	0	0	0	40	0	0		0	0	#DIV/0!	#DIV/0!
82	1—2	33	C5	23.1667	8.91667	32.0833	0.277922	25.5	8.5	34	0.25	07:12:00	GFP only	2	40	39	44	40	102.5	30750	0	0	0	0	40	0	0		102.5	30750	1	0
83	1—2	33	C6	23.1667	8.91667	32.0833	0.277922	25.5	8.5	34	0.25	07:25:00	aposymbiotic	0	0	0	0	40	0	0	0	0	0	0	40	0	0		0	0	#DIV/0!	#DIV/0!
84	1—2	33	D1	23.1667	8.91667	32.0833	0.277922	25.5	8.5	34	0.25	07:30:00	aposymbiotic	0	0	0	0	40	0	0	0	0	0	0	40	0	0		0	0	#DIV/0!	#DIV/0!
85	1—2	33	D2	23.1667	8.91667	32.0833	0.277922	25.5	8.5	34	0.25	07:36:00	aposymbiotic	0	0	0	0	40	0	0	0	0	0	0	40	0	0		0	0	#DIV/0!	#DIV/0!
86	1—2	33	D3	23.1667	8.91667	32.0833	0.277922	25.5	8.5	34	0.25	07:43:00	GFP only	0	77	76	55	40	1.73333	520	0	0	0	0	40	0	0		1.73333	520	1	0
87	0—1	33	B4	2.64167	0.733333	3.375	0.217284	2.19167	0.733333	2.925	0.250712	13:24:00	RFP only	0	0	0	0	40	0	0	2	442	474	425	40	1117.5	335250		1117.5	335250	0	1
88	0—1	33	C5	2.64167	0.733333	3.375	0.217284	2.19167	0.733333	2.925	0.250712	14:20:00	GFP only	1	172	173	182	40	43.9167	13175	0	0	0	0	40	0	0		43.9167	13175	1	0
