# Supplementary material for: Ecological drift during colonization drives within-host and between-host heterogeneity in an animal-associated symbiont
Source: PLoS Biol. 2024 Apr 25;22(4):e3002304. doi: 10.1371/journal.pbio.3002304 (PMC11075893; doi:10.1371/journal.pbio.3002304)
Supplement: S6 Code — (R) [file pbio.3002304.s023.R]

library(ggforce)    #version 0.3.3; required for trans_reverser
library(ggplot2)    #version 3.4.2
library(mousetrap)  #version 3.2.0; required for bimodality_coefficient
library(readxl)     #version 1.3.1
library(scales)     #version 1.2.1; for percentage values in axes
library(dplyr)      #version 1.0.7
library(colorspace) #version 2.0.2; required for scale_fill_discrete_diverging
library(diptest)    #version 0.76.0; required for dip.test

dat <- read_excel("S2 Data - GA-OX1-only.xlsx")
#View(dat)

#I will focus on percent composition data based on amount of GA-OX1 dTomato-V1 ("RFP").

#Making the dataframe that includes all my data:
samples <- data.frame(
  categories = dat$'Dilution_Category',                  #I am aggregating my trials- this is how my trials are lumped together
  densities= dat$'Inoculum_Density_Before',              #The inoculum density each bug ingested
  bugRFPpercentages = dat$`percent_RFP_CFUs`,            #The %RFP recovered from each bug
  inocRFPpercentages = dat$'percent_dTomato_before'      #The %RFP in the inoculum ingested by each bug
)
samples<-na.omit(samples)                                #I am removing lots of NA values from bugs that remained aposymbiotic or were colonized but yielded no CFUs
samples=samples %>% arrange(categories)                  #Ordering my dataframe by aggregated trials
#samples

###################################################################################################################
#I also need to include, along with my data, the average %RFP of all inocula across all the trials.
#NOTE: This average is unweighted!
#I am literally just averaging the %RFP for all the trials regardless of how many bugs were infected within each trial.

mean(unique(samples$inocRFPpercentages))

###################################################################################################################
#Plotting just the inocula:
xl <- "Inoculum Density (CFU/�L)"

ggplot(samples, aes(x = densities, y = inocRFPpercentages, group = densities))+
  scale_y_continuous(limits = c(0,1), breaks=c(0,0.25,0.5,0.75,1),labels=percent)+
  scale_x_continuous(trans=trans_reverser('log10'), breaks=c(10,100,1000,10000,100000,1000000), labels = c(expression("10"^1), expression("10"^2), expression("10"^3), expression("10"^4), expression("10"^5), expression("10"^6)))+
  geom_hline(size=1.5, linetype="dotted", yintercept=mean(unique(samples$inocRFPpercentages)))+
  geom_vline(size=1.5, linetype="dashed", color= "gray60", xintercept=c(10,100,1000,10000,100000,1000000))+
  geom_point(size=1.5, pch=4, color="#00AAD4", stroke=2.5)+
  labs(x=xl, y="% RFP Composition")+
  theme_classic(base_size=25)+
  theme(axis.text.x = element_text(vjust=0.85), legend.position = "none")

#ggsave("~/FigS1A.tiff", height=8, width=11, limitsize=FALSE)

#Plotting the inocula and the unaggregated data:
ggplot(samples, aes(x = densities, y = bugRFPpercentages, group = densities))+
  scale_fill_gradient2(low="#70AD47", high="#FF00FF", midpoint=mean(unique(samples$inocRFPpercentages)))+
  scale_y_continuous(limits = c(0,1), breaks=c(0,0.25,0.5,0.75,1),labels=percent)+
  scale_x_continuous(trans=trans_reverser('log10'), breaks=c(10,100,1000,10000,100000,1000000), labels = c(expression("10"^1), expression("10"^2), expression("10"^3), expression("10"^4), expression("10"^5), expression("10"^6)))+
  geom_hline(size=1.5, linetype="dotted", yintercept=mean(unique(samples$inocRFPpercentages)))+
  geom_vline(size=1.5, linetype="dashed", color= "gray", xintercept=c(10,100,1000,10000,100000,1000000))+
  labs(x=xl, y="% RFP Composition")+
  geom_point(aes(y=inocRFPpercentages), size=1.5, pch=4, color="#00AAD4", stroke=2.5)+
  geom_point(data=samples, aes(x = densities, y = bugRFPpercentages, fill=bugRFPpercentages), shape=21, size=4.5, alpha=0.6)+
  theme_classic(base_size=25)+
  theme(axis.text.x = element_text(vjust=0.85), legend.position = "none")
  
#ggsave("~/FigS1B.tiff", height=8, width=11, limitsize=FALSE)

###################################################################################################################
#rearrange the dataframe by aggregated inoculum treatment:
samples=samples %>% arrange(densities)
tail(samples)

###################################################################################################################
#Plotting both bimodality coefficients and variances from percentage data aggregated by inoculum size:
RFP_bugs=c()
RFP_trials=c()
RFP_coefficients=c()
RFP_variances=c()
RFP_variances3=c()

for (i in c(1:length(samples$categories))) {
  if (i==1){
    RFP_trials<-samples[i,2]                      #read in the first trial's inoculum size
    RFP_bugs<-append(RFP_bugs,samples[i,3])       #begin collecting bug results from this trial so we can analyze it
  }    
  
  if (i>1){
    if (samples[i,2]==samples[i-1,2]){            #if the inoculum treatment for this next bug is the same as the previous bug,
      RFP_bugs<-append(RFP_bugs,samples[i,3])    #add its result into RFP_bugs
    }
    if (samples[i,2]!=samples[i-1,2]){
      #print(length(RFP_bugs))
      #print(paste("For the trial using an inoculum containing", df1[i-1,1], "CFU/uL, the bimodality coefficient was:"))
      #print(bimodality_coefficient(RFP_bugs))                             #before we read in the next trial's data,
      RFP_coefficients<-append(RFP_coefficients, bimodality_coefficient(RFP_bugs))      #calculate the bimodality coefficient for the previous trial
      RFP_variances<-append(RFP_variances, var(RFP_bugs))      #calculate the variance for the previous trial
      RFP_variances3<-append(RFP_variances3, 3*var(RFP_bugs))      #calculate the variance for the previous trial
      RFP_trials<-append(RFP_trials,samples[i,2])                         #now that that is done, read in the next trial's inoculum size
      #print(samples[i,1])
      RFP_bugs=c()
      RFP_bugs<-append(RFP_bugs,samples[i,3])
    }
    if (i==length(samples$categories)){
      #print(length(RFP_bugs))
      #print(paste("For the trial using an inoculum containing", df1[i-1,1], "CFU/uL, the bimodality coefficient was:"))
      #print(bimodality_coefficient(RFP_bugs))
      RFP_coefficients<-append(RFP_coefficients, bimodality_coefficient(RFP_bugs))
      RFP_variances<-append(RFP_variances, var(RFP_bugs))
      RFP_variances3<-append(RFP_variances3, 3*var(RFP_bugs))      #calculate the variance for the previous trial
      #RFP_trials<-append(RFP_trials)
    }  
  }
  
}

RFP_bugs
RFP_trials
RFP_coefficients
RFP_variances
RFP_variances3

df.all <- data.frame(
  Inoculum_Density = RFP_trials,
  Bimodality_Coefficient = RFP_coefficients,
  Variance = RFP_variances,
  three_times_variance = RFP_variances3)
df.all
write.csv(df.all, "~/neutral_bimodality_coeffs_variances.csv", row.names=FALSE)

#plot bimodality coefficient + variance, using three_times_variance and a compensatory y-axis:
ggplot(df.all, aes(x = Inoculum_Density))+

  geom_hline(size=1.5, linetype="dotted", yintercept=0.555)+
  scale_y_continuous(limits = c(0,1), name="Bimodality Coefficient", breaks=c(0,0.555,1)#, sec.axis = sec_axis(trans = ~., name="Variance")
                     )+   #sec.axis specifies a second y-axis. trans rescales the y-axis by one-third, compensating for the fact we multiplied the raw variance values by 3.
  scale_x_continuous(breaks=c(10,100,1000,10000,100000,1000000), labels = c(expression("10"^1), expression("10"^2), expression("10"^3), expression("10"^4), expression("10"^5), expression("10"^6)),
                     trans=trans_reverser('log10'))+
  geom_vline(size=1.5, linetype="dashed", color= "gray60", xintercept=c(10,100,1000,10000,100000,1000000))+
  labs(x=xl)+
  #geom_point(aes(y=Variance), size=7, color='#00ADAD')+
  geom_point(aes(y=Bimodality_Coefficient), size=7, pch=16, stroke=1.5)+
  theme_classic(base_size=25)+
  theme(axis.text.x = element_text(vjust=0.85), legend.position = "none", axis.line.y.right=element_line(color='#00ADAD'), axis.ticks.y.right=element_line(color='#00ADAD'))

#Note that 5 trials could not compute a bimodality coefficient due to insufficient number of bugs sampled in those particular trials.

#ggsave("~/FigS1C.tiff", height=8, width=8, limitsize=FALSE)
