# Supplementary material for: Ecological drift during colonization drives within-host and between-host heterogeneity in an animal-associated symbiont
Source: PLoS Biol. 2024 Apr 25;22(4):e3002304. doi: 10.1371/journal.pbio.3002304 (PMC11075893; doi:10.1371/journal.pbio.3002304)
Supplement: S6 Data — Colony count data of SQ4a RFP and GA-OX1 GFPmut3 colonization trials from each insect, including insects from which no fluorescent colonies were recovered. (XLSX) [file pbio.3002304.s016.xlsx]

## Sheet: Sheet1
Index	Dilution_Category	Trial	L2_ID	sfGFP_Inoculum_before	dTomato_Inoculum_before	Inoculum_Density_Before	percent_sfGFP_before	sfGFP_Inoculum_after	dTomato_Inoculum_after	Inoculum_Density_After	%sfGFP_after	Time	Crypt_phenotype	Dilution_Level	GFP_CFU_1	GFP_CFU_2	GFP_CFU_3	Spot_Volume_(uL)	GFP_CFU/uL	Total_GFP_CFU/sample	Dilution_Level	dTomato_CFU_1	dTomato_CFU_2	dTomato_CFU_3	Spot_Volume_(uL)	dTomato_CFU/uL	Total_dTomato_CFU/sample		Average_CFU/uL	Total_CFU/sample	percent_GFP_CFUs	percent_RFP_CFUs
1	10^4 - 10^5	34	A1	10666.7	31916.7	42583.3	0.250489	9416.67	28333.3	37750	0.249448	2022-06-08 09:00:00	aposymbiotic L2	0	0	0	0	40	0	0	0	0	0	0	40	0	0		0	0	#DIV/0!	#DIV/0!
2	10^4 - 10^5	34	A2	10666.7	31916.7	42583.3	0.250489	9416.67	28333.3	37750	0.249448	2022-06-08 09:14:00	mostly GFP, little RFP L3	3	120	122	115	40	2975	892500	0	0	0	0	40	0	0		2975	892500	1	0
3	10^4 - 10^5	34	A3	10666.7	31916.7	42583.3	0.250489	9416.67	28333.3	37750	0.249448	2022-06-08 09:22:00	L2 50/50 GFP/RFP	3	56	46	72	40	1450	435000	2	78	69	71	40	181.667	54500		1631.67	489500	0.888662	0.111338
4	10^4 - 10^5	34	A4	10666.7	31916.7	42583.3	0.250489	9416.67	28333.3	37750	0.249448	2022-06-08 09:32:00	L2 mostly RFP +15 GFP crypts	1	140	120	129	40	32.4167	9725	2	195	213	205	40	510.833	153250		543.25	162975	0.0596717	0.940328
5	10^4 - 10^5	34	A5	10666.7	31916.7	42583.3	0.250489	9416.67	28333.3	37750	0.249448	2022-06-08 09:42:00	L3 RFP only	0	0	0	0	40	0	0	3	19	28	29	40	633.333	190000		633.333	190000	0	1
6	10^4 - 10^5	34	B1	10666.7	31916.7	42583.3	0.250489	9416.67	28333.3	37750	0.249448	2022-06-08 09:50:00	L3 RFP only	0	0	0	0	40	0	0	2	307	301	278	40	738.333	221500		738.333	221500	0	1
7	10^4 - 10^5	34	B2	10666.7	31916.7	42583.3	0.250489	9416.67	28333.3	37750	0.249448	2022-06-08 10:01:00	L3 GFP +5 RFP crypts; L3; ruptured M3	2	40	32	32	40	86.6667	26000	0	448	417	586	40	12.0917	3627.5		98.7583	29627.5	0.877563	0.122437
8	10^4 - 10^5	34	B3	10666.7	31916.7	42583.3	0.250489	9416.67	28333.3	37750	0.249448	2022-06-08 10:10:00	GFP only, L3 died mid-molt	3	16	12	16	40	366.667	110000	1	11	9	4	40	2	600		368.667	110600	0.994575	0.00542495
9	10^4 - 10^5	34	B4	10666.7	31916.7	42583.3	0.250489	9416.67	28333.3	37750	0.249448	2022-06-08 10:20:00	L3 mostly RFP, very little GFP	1	75	79	62	40	18	5400	1	20	34	19	40	6.08333	1825		24.0833	7225	0.747405	0.252595
10	10^4 - 10^5	34	B5	10666.7	31916.7	42583.3	0.250489	9416.67	28333.3	37750	0.249448	2022-06-08 10:32:00	L3 GFP only	2	52	58	42	40	126.667	38000	0	15	6	9	40	0.25	75		126.917	38075	0.99803	0.0019698
11	10^4 - 10^5	34	B6	10666.7	31916.7	42583.3	0.250489	9416.67	28333.3	37750	0.249448	2022-06-08 10:43:00	L3 mostly GFP, some RFP	3	26	29	20	40	625	187500	2	177	154	203	40	445	133500		1070	321000	0.584112	0.415888
12	10^4 - 10^5	34	C1	10666.7	31916.7	42583.3	0.250489	9416.67	28333.3	37750	0.249448	2022-06-07 15:23:00	L3 mostly GFP, 15% RFP	4	61	63	59	40	15250	4575000	2	13	18	9	40	33.3333	10000		15283.3	4585000	0.997819	0.00218103
13	10^4 - 10^5	34	C2	10666.7	31916.7	42583.3	0.250489	9416.67	28333.3	37750	0.249448	2022-06-07 15:30:00	L3 50/50 GFP/RFP	3	145	149	144	40	3650	1095000	3	111	95	105	40	2591.67	777500		6241.67	1872500	0.58478	0.41522
14	10^4 - 10^5	34	C3	10666.7	31916.7	42583.3	0.250489	9416.67	28333.3	37750	0.249448	2022-06-07 15:41:00	L2 60% RFP 40% GFP	0	156	149	142	40	3.725	1117.5	0	170	181	182	40	4.44167	1332.5		8.16667	2450	0.456122	0.543878
15	10^4 - 10^5	34	C6	10666.7	31916.7	42583.3	0.250489	9416.67	28333.3	37750	0.249448	2022-06-07 15:49:00	L3 60% GFP, 40% RFP	3	66	44	55	40	1375	412500	2	71	68	48	40	155.833	46750		1530.83	459250	0.898204	0.101796
16	10^3 - 10^4	34	A1	1191.67	3125	4316.67	0.276062	1008.33	2441.67	3450	0.292271	12:31:00	aposymbiotic L3	0	0	0	0	40	0	0	0	0	0	0	40	0	0		0	0	#DIV/0!	#DIV/0!
17	10^3 - 10^4	34	A2	1191.67	3125	4316.67	0.276062	1008.33	2441.67	3450	0.292271	12:39:00	RFP only L3	0	0	0	0	40	0	0	4	32	40	36	40	9000	2700000		9000	2700000	0	1
18	10^3 - 10^4	34	A3	1191.67	3125	4316.67	0.276062	1008.33	2441.67	3450	0.292271	12:46:00	apo/early colonization L2	0	0	0	0	40	0	0	0	0	0	0	40	0	0		0	0	#DIV/0!	#DIV/0!
19	10^3 - 10^4	34	A4	1191.67	3125	4316.67	0.276062	1008.33	2441.67	3450	0.292271	12:54:00	RFP only freshly molted L3					40	#DIV/0!	#DIV/0!					40	#DIV/0!	#DIV/0!		#DIV/0!	#DIV/0!	#DIV/0!	#DIV/0!
20	10^3 - 10^4	34	A5	1191.67	3125	4316.67	0.276062	1008.33	2441.67	3450	0.292271	13:03:00	RFP only L2	0	0	0	0	40	0	0	1	621	507	426	40	129.5	38850		129.5	38850	0	1
21	10^3 - 10^4	34	A6	1191.67	3125	4316.67	0.276062	1008.33	2441.67	3450	0.292271	13:09:00	aposymbiotic L2	0	0	0	0	40	0	0	0	0	0	0	40	0	0		0	0	#DIV/0!	#DIV/0!
22	10^3 - 10^4	34	B1	1191.67	3125	4316.67	0.276062	1008.33	2441.67	3450	0.292271	13:21:00	80% RFP, 20% GFP L2	3	77	66	84	40	1891.67	567500	3	51	60	50	40	1341.67	402500		3233.33	970000	0.585052	0.414948
23	10^3 - 10^4	34	B2	1191.67	3125	4316.67	0.276062	1008.33	2441.67	3450	0.292271	13:38:00	almost entirely RFP +5 GFP crypts L2	1	117	119	105	40	28.4167	8525	2	85	69	91	40	204.167	61250		232.583	69775	0.122178	0.877822
24	10^3 - 10^4	34	B3	1191.67	3125	4316.67	0.276062	1008.33	2441.67	3450	0.292271	13:48:00	almost entirely RFP +2 GFP crypts L3	3	73	78	89	40	2000	600000	2	28	20	13	40	50.8333	15250		2050.83	615250	0.975213	0.0247867
25	10^3 - 10^4	34	B4	1191.67	3125	4316.67	0.276062	1008.33	2441.67	3450	0.292271	14:02:00	2 GFP:1 RFP L2	3	80	92	84	40	2133.33	640000	2	46	39	54	40	115.833	34750		2249.17	674750	0.948499	0.0515006
26	10^3 - 10^4	34	B5	1191.67	3125	4316.67	0.276062	1008.33	2441.67	3450	0.292271	14:16:00	L2 50/50 GFP/RFP	3	43	29	45	40	975	292500	2	13	21	18	40	43.3333	13000		1018.33	305500	0.957447	0.0425532
27	10^3 - 10^4	34	B6	1191.67	3125	4316.67	0.276062	1008.33	2441.67	3450	0.292271							40	#DIV/0!	#DIV/0!					40	#DIV/0!	#DIV/0!		#DIV/0!	#DIV/0!	#DIV/0!	#DIV/0!
28	10^3 - 10^4	34	C1	1191.67	3125	4316.67	0.276062	1008.33	2441.67	3450	0.292271	14:25:00	L3 almost entirely GFP +3 RFP crypts	3	46	32	36	40	950	285000	0	0	0	0	40	0	0		950	285000	1	0
29	10^3 - 10^4	34	C2	1191.67	3125	4316.67	0.276062	1008.33	2441.67	3450	0.292271	14:41:00	L2 GFP only	0	too many to count	too many to count	too many to count	40	#DIV/0!	#DIV/0!	0	0	0	0	40	0	0		#DIV/0!	#DIV/0!	#DIV/0!	#DIV/0!
30	10^3 - 10^4	34	C3	1191.67	3125	4316.67	0.276062	1008.33	2441.67	3450	0.292271	14:49:00	L3 GFP +26 RFP crypts	2	23	23	17	40	52.5	15750	0	31	20	39	40	0.75	225		53.25	15975	0.985915	0.0140845
31	10^1 - 10^2	35	A1	14.4167	28.6667	43.0833	0.334623	15.1667	29.3333	44.5	0.340824	16:51:00	RFP only L2	0	0	0	0	40	0	0	1	115	142	137	40	32.8333	9850		32.8333	9850	0	1
32	10^1 - 10^2	35	A2	14.4167	28.6667	43.0833	0.334623	15.1667	29.3333	44.5	0.340824	17:05:00	L2 almost entirely GFP, 5 RFP crypts	3	50	37	45	40	1100	330000	0	118	95	77	40	2.41667	725		1102.42	330725	0.997808	0.00219215
33	10^1 - 10^2	35	A3	14.4167	28.6667	43.0833	0.334623	15.1667	29.3333	44.5	0.340824	17:26:00	RFP only L2	0	0	0	0	40	0	0	2	142	137	118	40	330.833	99250		330.833	99250	0	1
34	10^1 - 10^2	35	A4	14.4167	28.6667	43.0833	0.334623	15.1667	29.3333	44.5	0.340824	17:37:00	RFP only L2	0	0	0	0	40	0	0	2	20	20	30	40	58.3333	17500		58.3333	17500	0	1
35	10^1 - 10^2	35	A5	14.4167	28.6667	43.0833	0.334623	15.1667	29.3333	44.5	0.340824	17:45:00	aposymbiotic L2	0	0	0	0	40	0	0	0	0	0	0	40	0	0		0	0	#DIV/0!	#DIV/0!
36	10^1 - 10^2	35	A6	14.4167	28.6667	43.0833	0.334623	15.1667	29.3333	44.5	0.340824	18:11:00	RFP only L2	0	0	0	0	40	0	0	2	212	208	180	40	500	150000		500	150000	0	1
37	10^1 - 10^2	35	B1	14.4167	28.6667	43.0833	0.334623	15.1667	29.3333	44.5	0.340824	18:23:00	RFP only L2	0	0	0	0	40	0	0	1	48	51	40	40	11.5833	3475		11.5833	3475	0	1
38	10^1 - 10^2	35	B3	14.4167	28.6667	43.0833	0.334623	15.1667	29.3333	44.5	0.340824	18:33:00	L2 almost entirely GFP, 4 RFP crypts	1	70	91	89	40	20.8333	6250	0	0	5	1	40	0.05	15		20.8833	6265	0.997606	0.00239425
39	10^1 - 10^2	35	B4	14.4167	28.6667	43.0833	0.334623	15.1667	29.3333	44.5	0.340824	18:45:00	RFP only L2	0	0	0	0	40	0	0	1	63	68	54	40	15.4167	4625		15.4167	4625	0	1
40	10^1 - 10^2	35	B5	14.4167	28.6667	43.0833	0.334623	15.1667	29.3333	44.5	0.340824	18:54:00	RFP only L2	0	0	0	0	40	0	0	3	58	64	63	40	1541.67	462500		1541.67	462500	0	1
41	10^1 - 10^2	35	B6	14.4167	28.6667	43.0833	0.334623	15.1667	29.3333	44.5	0.340824	19:00:00	aposymbiotic L2	0	0	0	0	40	0	0	0	0	0	0	40	0	0		0	0	#DIV/0!	#DIV/0!
42	10^2 - 10^3	36	A1	74.1667	207.5	281.667	0.263314	97.5	214.167	311.667	0.312834	08:48:00	aposymbiotic L2	0	0	0	0	40	0	0	0	0	0	0	40	0	0		0	0	#DIV/0!	#DIV/0!
43	10^2 - 10^3	36	A2	74.1667	207.5	281.667	0.263314	97.5	214.167	311.667	0.312834	08:53:00	aposymbiotic L2	0	0	0	0	40	0	0	0	0	0	0	40	0	0		0	0	#DIV/0!	#DIV/0!
44	10^2 - 10^3	36	A3	74.1667	207.5	281.667	0.263314	97.5	214.167	311.667	0.312834	09:01:00	aposymbiotic L2	0	0	0	0	40	0	0	0	0	0	0	40	0	0		0	0	#DIV/0!	#DIV/0!
45	10^2 - 10^3	36	A4	74.1667	207.5	281.667	0.263314	97.5	214.167	311.667	0.312834	09:10:00	50/50 RFP/GFP L2	3	86	66	68	40	1833.33	550000	4	55	42	40	40	11416.7	3425000		13250	3975000	0.138365	0.861635
46	10^2 - 10^3	36	A5	74.1667	207.5	281.667	0.263314	97.5	214.167	311.667	0.312834	09:17:00	1:2 RFP:GFP L2	3	29	23	39	40	758.333	227500	3	72	74	82	40	1900	570000		2658.33	797500	0.285266	0.714734
47	10^2 - 10^3	36	A6	74.1667	207.5	281.667	0.263314	97.5	214.167	311.667	0.312834	09:25:00	aposymbiotic L3	0	0	0	0	40	0	0	0	0	0	0	40	0	0		0	0	#DIV/0!	#DIV/0!
48	10^2 - 10^3	36	B1	74.1667	207.5	281.667	0.263314	97.5	214.167	311.667	0.312834	09:33:00	GFP only L2	1	49	58	53	40	13.3333	4000	0	0	0	0	40	0	0		13.3333	4000	1	0
49	10^2 - 10^3	36	B2	74.1667	207.5	281.667	0.263314	97.5	214.167	311.667	0.312834	09:39:00	aposymbiotic L2	0	0	0	0	40	0	0	0	0	0	0	40	0	0		0	0	#DIV/0!	#DIV/0!
50	10^2 - 10^3	36	B3	74.1667	207.5	281.667	0.263314	97.5	214.167	311.667	0.312834	09:52:00	9:1 GFP:RFP L2	1	56	43	52	40	12.5833	3775	0	85	68	49	40	1.68333	505		14.2667	4280	0.882009	0.117991
51	10^2 - 10^3	36	B4	74.1667	207.5	281.667	0.263314	97.5	214.167	311.667	0.312834							40	#DIV/0!	#DIV/0!					40	#DIV/0!	#DIV/0!		#DIV/0!	#DIV/0!	#DIV/0!	#DIV/0!
52	10^2 - 10^3	36	B5	74.1667	207.5	281.667	0.263314	97.5	214.167	311.667	0.312834	10:03:00	50/50 RFP/GFP L2	1	75	81	68	40	18.6667	5600	1	385	327	215	40	77.25	23175		95.9167	28775	0.194613	0.805387
53	10^2 - 10^3	36	B6	74.1667	207.5	281.667	0.263314	97.5	214.167	311.667	0.312834	10:10:00	aposymbiotic L2	0	0	0	0	40	0	0	0	0	0	0	40	0	0		0	0	#DIV/0!	#DIV/0!
54	10^2 - 10^3	36	C1	74.1667	207.5	281.667	0.263314	97.5	214.167	311.667	0.312834	10:30:00	50/50 RFP/GFP L2	1	56	59	42	40	13.0833	3925	2	113	103	72	40	240	72000		253.083	75925	0.0516958	0.948304
55	10^2 - 10^3	36	C2	74.1667	207.5	281.667	0.263314	97.5	214.167	311.667	0.312834	10:37:00	75:25 GFP:RFP L3	2	97	96	88	40	234.167	70250	2	50	52	37	40	115.833	34750		350	105000	0.669048	0.330952
56	10^2 - 10^3	36	C3	74.1667	207.5	281.667	0.263314	97.5	214.167	311.667	0.312834							40	#DIV/0!	#DIV/0!					40	#DIV/0!	#DIV/0!		#DIV/0!	#DIV/0!	#DIV/0!	#DIV/0!
57	10^2 - 10^3	36	C4	74.1667	207.5	281.667	0.263314	97.5	214.167	311.667	0.312834	10:43:00	GFP only L2	1	98	87	73	40	21.5	6450	0	0	0	0	40	0	0		21.5	6450	1	0
58	10^2 - 10^3	36	C5	74.1667	207.5	281.667	0.263314	97.5	214.167	311.667	0.312834	10:53:00	almost only GFP L3	2	42	33	19	40	78.3333	23500	1	0	6	3	40	0.75	225		79.0833	23725	0.990516	0.00948367
59	10^2 - 10^3	36	C6	74.1667	207.5	281.667	0.263314	97.5	214.167	311.667	0.312834	10:58:00	aposymbiotic L2	0	0	0	0	40	0	0	0	0	0	0	40	0	0		0	0	#DIV/0!	#DIV/0!
60	10^2 - 10^3	36	D1	74.1667	207.5	281.667	0.263314	97.5	214.167	311.667	0.312834	11:05:00	GFP only L2	2	27	12	22	40	50.8333	15250	0	0	0	0	40	0	0		50.8333	15250	1	0
61	10^2 - 10^3	36	D2	74.1667	207.5	281.667	0.263314	97.5	214.167	311.667	0.312834	11:11:00	RFP only L2	0	0	0	0	40	0	0	2	255	347	255	40	714.167	214250		714.167	214250	0	1
62	10^1 - 10^2	36	A1	6.85	19.4167	26.2667	0.260787	7.86667	19.5833	27.45	0.286582	02:08:00	RFP only L2	0	0	0	0	40	0	0	2	19	19	14	40	43.3333	13000		43.3333	13000	0	1
63	10^1 - 10^2	36	A2	6.85	19.4167	26.2667	0.260787	7.86667	19.5833	27.45	0.286582	02:16:00	aposymbiotic L2	0	0	0	0	40	0	0	0	0	0	0	40	0	0		0	0	#DIV/0!	#DIV/0!
64	10^1 - 10^2	36	A3	6.85	19.4167	26.2667	0.260787	7.86667	19.5833	27.45	0.286582	02:32:00	RFP only L2	0	0	0	0	40	0	0	2	52	66	65	40	152.5	45750		152.5	45750	0	1
65	10^1 - 10^2	36	A5	6.85	19.4167	26.2667	0.260787	7.86667	19.5833	27.45	0.286582	02:40:00	aposymbiotic L2	0	0	0	0	40	0	0	0	0	0	0	40	0	0		0	0	#DIV/0!	#DIV/0!
66	10^1 - 10^2	36	A6	6.85	19.4167	26.2667	0.260787	7.86667	19.5833	27.45	0.286582	02:46:00	aposymbiotic L2	0	0	0	0	40	0	0	0	0	0	0	40	0	0		0	0	#DIV/0!	#DIV/0!
67	10^1 - 10^2	36	B1	6.85	19.4167	26.2667	0.260787	7.86667	19.5833	27.45	0.286582	02:54:00	aposymbiotic L2	0	0	0	0	40	0	0	0	0	0	0	40	0	0		0	0	#DIV/0!	#DIV/0!
68	10^1 - 10^2	36	B2	6.85	19.4167	26.2667	0.260787	7.86667	19.5833	27.45	0.286582	03:01:00	aposymbiotic L2	0	0	0	0	40	0	0	0	0	0	0	40	0	0		0	0	#DIV/0!	#DIV/0!
69	10^1 - 10^2	36	B3	6.85	19.4167	26.2667	0.260787	7.86667	19.5833	27.45	0.286582	03:08:00	aposymbiotic L2	0	0	0	0	40	0	0	0	0	0	0	40	0	0		0	0	#DIV/0!	#DIV/0!
70	10^1 - 10^2	36	B4	6.85	19.4167	26.2667	0.260787	7.86667	19.5833	27.45	0.286582	03:22:00	GFP only L2	0	0	0	0	40	0	0	0	0	0	0	40	0	0		0	0	#DIV/0!	#DIV/0!
71	10^1 - 10^2	36	B5	6.85	19.4167	26.2667	0.260787	7.86667	19.5833	27.45	0.286582	03:30:00	RFP only L2	0	0	0	0	40	0	0	2	14	16	6	40	30	9000		30	9000	0	1
72	10^1 - 10^2	36	C1	6.85	19.4167	26.2667	0.260787	7.86667	19.5833	27.45	0.286582	03:39:00	GFP only L2	1	143	130	144	40	34.75	10425	0	0	0	0	40	0	0		34.75	10425	1	0
73	10^1 - 10^2	36	C2	6.85	19.4167	26.2667	0.260787	7.86667	19.5833	27.45	0.286582	03:47:00	mostly GFP, about 5% RFP L2	2	19	24	41	40	70	21000	1	4	3	2	40	0.75	225		70.75	21225	0.989399	0.0106007
74	10^1 - 10^2	36	C4	6.85	19.4167	26.2667	0.260787	7.86667	19.5833	27.45	0.286582	03:55:00	aposymbiotic L2	0	0	0	0	40	0	0	0	0	0	0	40	0	0		0	0	#DIV/0!	#DIV/0!
75	10^1 - 10^2	36	C5	6.85	19.4167	26.2667	0.260787	7.86667	19.5833	27.45	0.286582	04:02:00	aposymbiotic L2	0	0	0	0	40	0	0	0	0	0	0	40	0	0		0	0	#DIV/0!	#DIV/0!
76	10^1 - 10^2	36	D1	6.85	19.4167	26.2667	0.260787	7.86667	19.5833	27.45	0.286582	04:21:00	aposymbiotic L3	0	0	0	0	40	0	0	0	0	0	0	40	0	0		0	0	#DIV/0!	#DIV/0!
77	10^1 - 10^2	36	D2	6.85	19.4167	26.2667	0.260787	7.86667	19.5833	27.45	0.286582	04:28:00	aposymbiotic L2	0	0	0	0	40	0	0	0	0	0	0	40	0	0		0	0	#DIV/0!	#DIV/0!
78	10^1 - 10^2	36	D3	6.85	19.4167	26.2667	0.260787	7.86667	19.5833	27.45	0.286582	04:35:00	RFP only L2	0	0	0	0	40	0	0	0	120	122	139	40	3.175	952.5		3.175	952.5	0	1
79	10^1 - 10^2	36	D4	6.85	19.4167	26.2667	0.260787	7.86667	19.5833	27.45	0.286582	04:44:00	50/50 RFP/GFP L2	1	40	31	41	40	9.33333	2800	1	75	72	74	40	18.4167	5525		27.75	8325	0.336336	0.663664
80	10^1 - 10^2	36	D5	6.85	19.4167	26.2667	0.260787	7.86667	19.5833	27.45	0.286582	04:52:00	RFP only L2	0	0	0	0	40	0	0	2	7	8	2	40	14.1667	4250		14.1667	4250	0	1
81	10^1 - 10^2	36	D6-2	6.85	19.4167	26.2667	0.260787	7.86667	19.5833	27.45	0.286582	05:06:00	GFP only L2	2	13	17	7	40	30.8333	9250	0	0	0	0	40	0	0		30.8333	9250	1	0
