# Supplementary material for: Ecological drift during colonization drives within-host and between-host heterogeneity in an animal-associated symbiont
Source: PLoS Biol. 2024 Apr 25;22(4):e3002304. doi: 10.1371/journal.pbio.3002304 (PMC11075893; doi:10.1371/journal.pbio.3002304)
Supplement: S9 Code — (R) [file pbio.3002304.s026.R]

library(readxl)  #version 1.3.1
library(ggplot2) #version 3.4.2
library(scales)  #version 1.2.1; for percentage values in axes
library(cowplot) #version 1.1.1

InocDensityChange <- function(file_pathname,green_strain,red_strain,ylimits) {
  dat<-read_excel(file_pathname)
  GFPbefore = c()
  GFPafter = c()
  RFPbefore = c()
  RFPafter = c()
  
  
  for (i in c(1:length(dat$sfGFP_Inoculum_before))){
    if (i==1){
      GFPbefore<-append(GFPbefore,dat$sfGFP_Inoculum_before[i])
      GFPafter<-append(GFPafter, dat$sfGFP_Inoculum_after[i])
      RFPbefore<-append(RFPbefore,dat$dTomato_Inoculum_before[i])
      RFPafter<-append(RFPafter, dat$dTomato_Inoculum_after[i])
      
    }    
    
    if (i>1){
      if (dat$sfGFP_Inoculum_before[i]!=dat$sfGFP_Inoculum_before[i-1]){
        GFPbefore<-append(GFPbefore,dat$sfGFP_Inoculum_before[i])
        GFPafter<-append(GFPafter, dat$sfGFP_Inoculum_after[i])
        RFPbefore<-append(RFPbefore,dat$dTomato_Inoculum_before[i])
        RFPafter<-append(RFPafter, dat$dTomato_Inoculum_after[i])
      }
    }
  }
  
  GFPbefore
  GFPafter
  RFPbefore
  RFPafter
  
  Before=c()
  After=c()
  for (i in c(1:length(unique(dat$sfGFP_Inoculum_before)))) {
    Before<-append(Before, 1)
    After<-append(After, 2)
  }
  Before
  After
  #Making the dataframe that includes all my data:
  samples <- data.frame(
    "Before"= Before,
    "GFP Before Inoculation" = GFPbefore,     #The GFP CFUs in the inoculum before inoculation
    "RFP Before Inoculation" = RFPbefore,
    "After"= After,
    "GFP After Inoculation"= GFPafter,        #The GFP CFUs in the inoculum after inoculation
    "RFP After Inoculation"= RFPafter
  )
  
  neutralGFP<-ggplot(data=samples)+
    geom_segment(aes(x = Before, y = GFP.Before.Inoculation, xend = After, yend = GFP.After.Inoculation), data = samples, color="yellow green", size=2)+
    scale_x_continuous(breaks = c(1,2), labels = c("Before", "After"))+
    scale_y_continuous(limits=ylimits,trans = log10_trans(), breaks= c(1e6,1e5,1e4,1e3,1e2,1e1), labels = c(expression("10"^6),expression("10"^5), expression("10"^4), expression("10"^3), expression("10"^2), expression("10"^1)))+
    labs(x=NULL, y=paste(green_strain,"CFUs/�L"))+
    theme_classic(base_size=25)+
    theme(axis.ticks.x = element_blank(), axis.text.x = element_text(vjust=2), legend.position = "none")
  neutralGFP
  
  neutralRFP<-ggplot(data=samples)+
    geom_segment(aes(x = Before, y = RFP.Before.Inoculation, xend = After, yend = RFP.After.Inoculation), data = samples, color="magenta", size=2)+
    scale_x_continuous(breaks = c(1,2), labels = c("Before", "After"))+
    scale_y_continuous(limits=ylimits, trans = log10_trans(), breaks= c(1e6,1e5,1e4,1e3,1e2,1e1), labels = c(expression("10"^6),expression("10"^5), expression("10"^4), expression("10"^3), expression("10"^2), expression("10"^1)))+
    labs(x=NULL, y=paste(red_strain,"CFUs/�L"))+
    theme_classic(base_size=25)+
    theme(axis.ticks.x = element_blank(), axis.text.x = element_text(vjust=2), legend.position = "none")
  neutralRFP
  
  print(samples)
  p1<-plot_grid(neutralGFP, neutralRFP)
  ggdraw(add_sub(plot=p1, "Nymphal Inoculation Period", size=25, vjust = 0.25))
  
}

####################################################################################################
neutral.inoc.change <- InocDensityChange(ylimits=c(5,1e6),
                                         green_strain="GA-OX1 GFP",
                                         red_strain="GA-OX1 RFP",
                                         file_pathname = "S2 Data - GA-OX1-only.xlsx")
neutral.inoc.change
ggsave2("NeutralCFUChange.png", width=8, height=8)

####################################################################################################
SQ4aGFPmut3.inoc.change <-InocDensityChange(ylimits=c(3,1e4),
                                            green_strain="SQ4a GFPmut3",
                                            red_strain="GA-OX1 RFP",
                                            file_pathname = "S4 Data - SQ4aGFPmut3-GA-OX1RFP.xlsx")
SQ4aGFPmut3.inoc.change
ggsave2("SQ4aGFPmut3CFUChange.png", width=8, height=8)

####################################################################################################
SQ4a_sfGFP.inoc.change <-InocDensityChange(ylimits=c(0.5,1e5),
                                           green_strain="SQ4a sfGFP",
                                           red_strain="GA-OX1 RFP",
                                           file_pathname = "S5 Data - SQ4a-sfGFP-GA-OX1RFP.xlsx")
SQ4a_sfGFP.inoc.change
ggsave2("SQ4a_sfGFPCFUChange.png", width=8, height=8)
####################################################################################################
SQ4a_dTomato.inoc.change <-InocDensityChange(ylimits=c(5,1e5),
                                             green_strain="GA-OX1 sfGFP",
                                             red_strain="SQ4a RFP",
                                             file_pathname = "S6 Data - SQ4aRFP-GA-OX1sfGFP.xlsx")
SQ4a_dTomato.inoc.change
ggsave2("SQ4a_dTomatoCFUChange.png", width=8, height=8)                   
